# Supplementary material for: Towards potential antifungal agents: synthesis, supramolecular self-assembly and in vitro activity of azole mono-, sesqui- and diterpenoids
Source: Royal Society of Chemistry journal article supplement (doi:10.1039/d3ob00528c), 2023-01-01
Supplement: d3ob00528c1.pdf [file d3ob00528c1.pdf]

## Supplementary Information

For

# Towards potential antifungal agents: synthesis, supramolecular self-assembly and in vitro activity of azole mono-, sesqui- and diterpenoids

Alan Akhmedov,<sup>a,c</sup> Rustem Gamirov,<sup>a</sup> Yulia Panina,<sup>a</sup> Evgenia Sokolova,<sup>b</sup> Yulia Leonteva,<sup>b</sup> Evgeniya Tarasova,<sup>c</sup> Ramziya Potekhina,<sup>c</sup> Igor Fitsev,<sup>c</sup> Dmitriy Shurpik,<sup>a</sup> and Ivan Stoikov<sup>\*a,c</sup>

<sup>a</sup>. A.M. Butlerov Chemical Institute, Kazan Federal University, Kremlevskaya, 18, 420008 Kazan, Russia

<sup>b</sup>. Institute of Fundamental Medicine and Biology, Kazan Federal University, Kremlevskaya, 18, 420008 Kazan, Russia

<sup>c</sup>. Federal State Budgetary Scientific Institution, Federal Center for Toxicological, Radiation, and Biological Safety, Nauchny Gorodok-2, 420075 Kazan, Russia

## Content

|                                                                                         |       |
|-----------------------------------------------------------------------------------------|-------|
| Figures S01-S14. <sup>1</sup> H NMR spectra of the compounds <b>2a-f</b> , <b>3a-h</b>  | 2-8   |
| Figures S15-S28. <sup>13</sup> C NMR spectra of the compounds <b>2a-f</b> , <b>3a-h</b> | 9-15  |
| Figures S29-S42. FT-IR spectra of the compounds <b>2a-f</b> , <b>3a-h</b>               | 16-22 |
| Figures S43-S50. HRMS spectra of the compounds <b>3a-h</b>                              | 23-26 |
| Dynamic light scattering                                                                | 27    |
| Figures S51-S52 TEM images                                                              | 28    |
| Figures S53-S56. Linear equation parameters of T <sub>m</sub> against Molar ratio       | 29-30 |
| Figures S57-59 Resazurin assay                                                          | 31    |

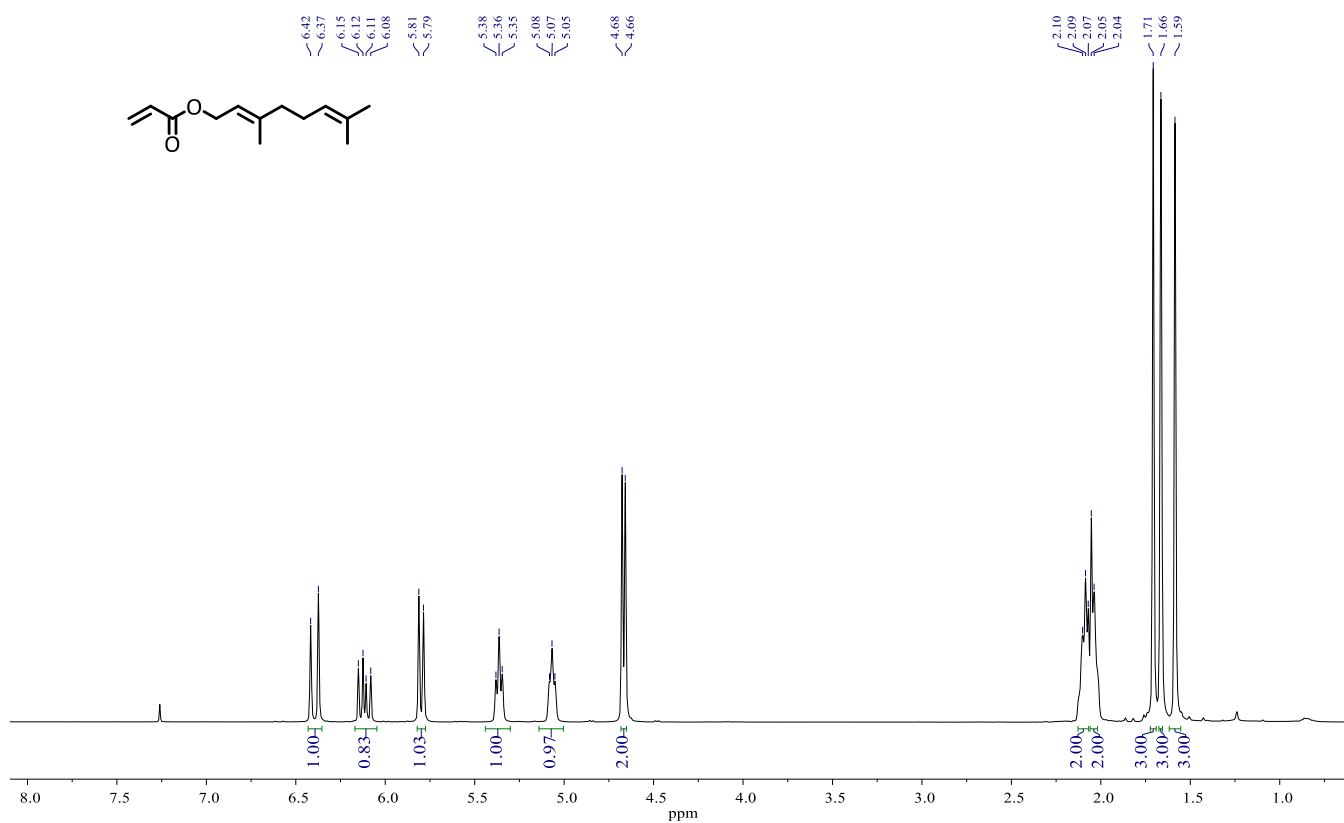

Figure S01. <sup>1</sup>H NMR spectrum of the compound **2a**, CDCl<sub>3</sub>, 298 K, 400 MHz.

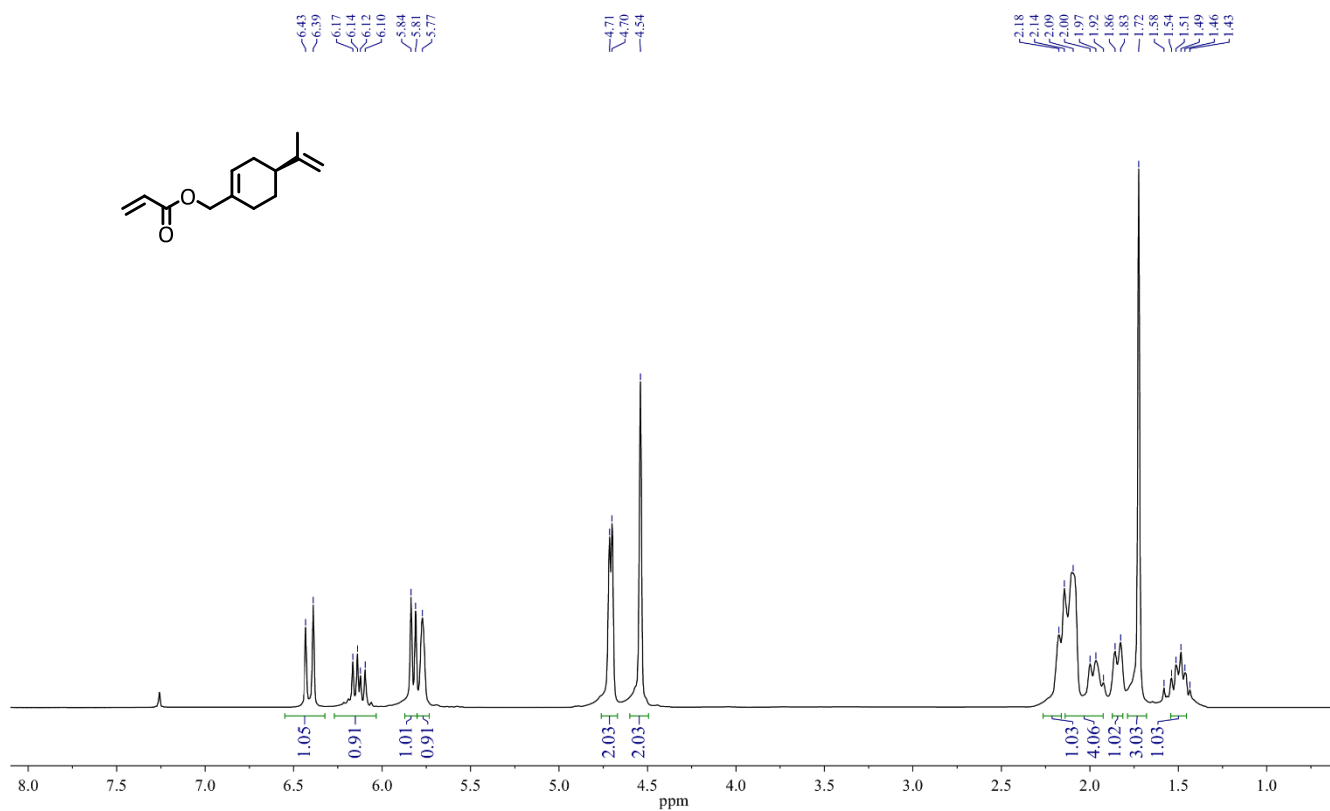

Figure S02. <sup>1</sup>H NMR spectrum of the compound **2b**, CDCl<sub>3</sub>, 298 K, 400 MHz.

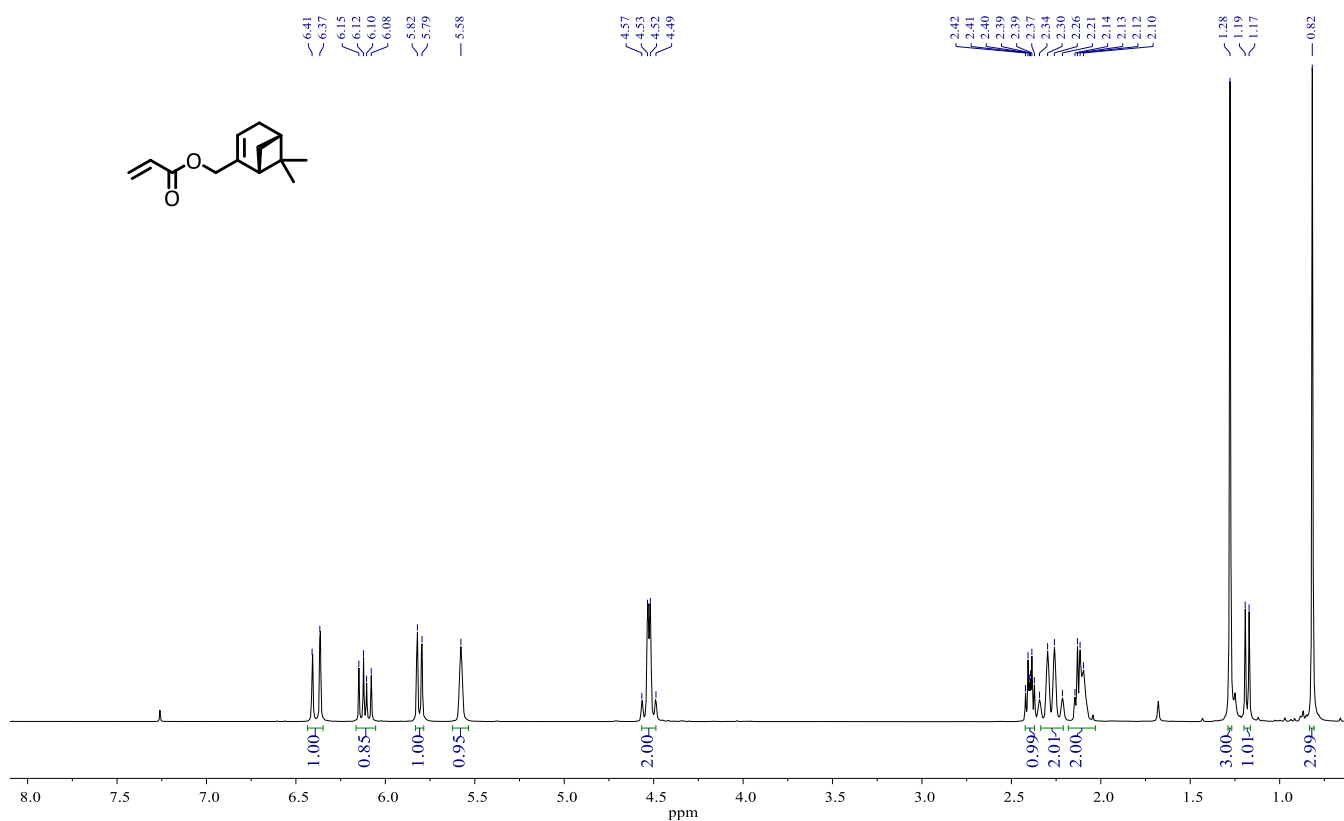

Figure S03. <sup>1</sup>H NMR spectrum of the compound **2c**, CDCl<sub>3</sub>, 298 K, 400 MHz.

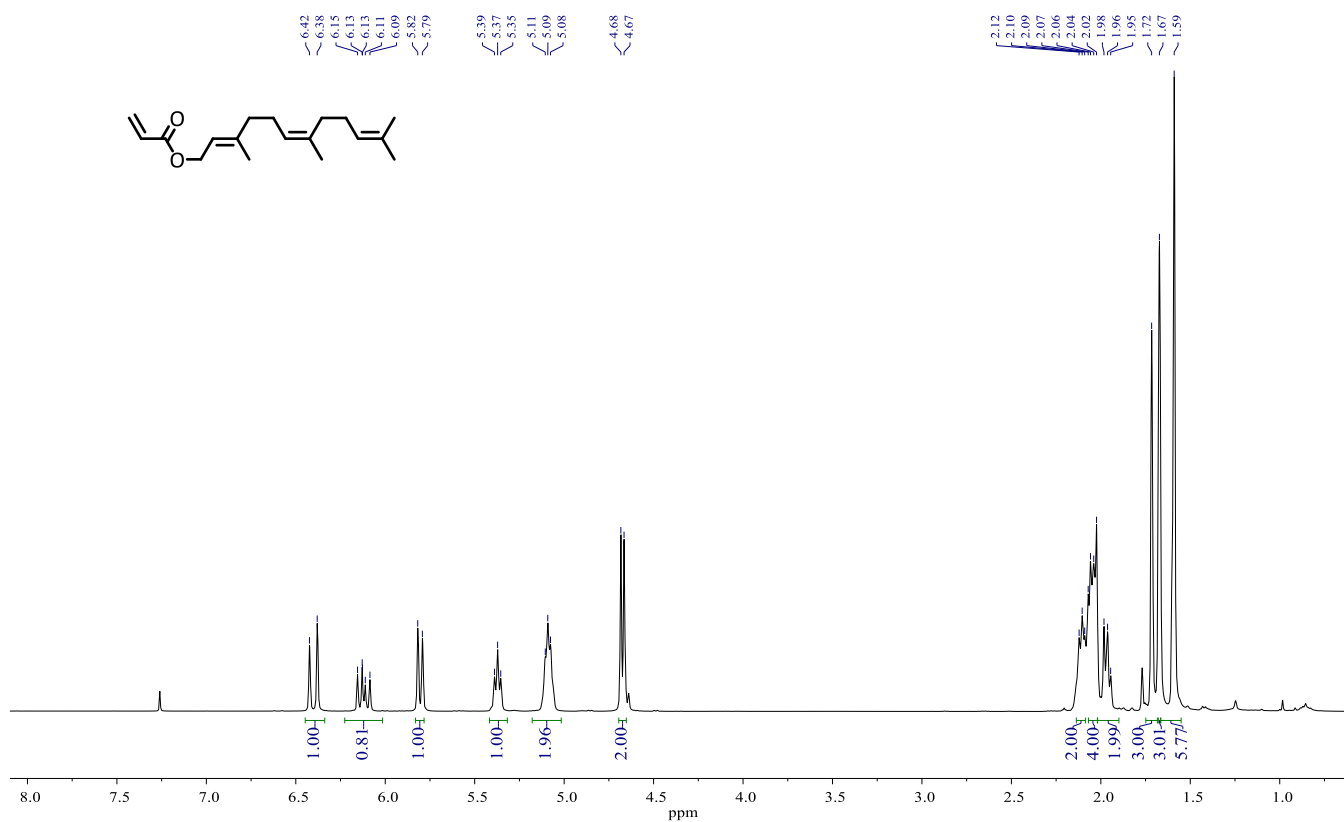

Figure S04. <sup>1</sup>H NMR spectrum of the compound **2d**, CDCl<sub>3</sub>, 298 K, 400 MHz.

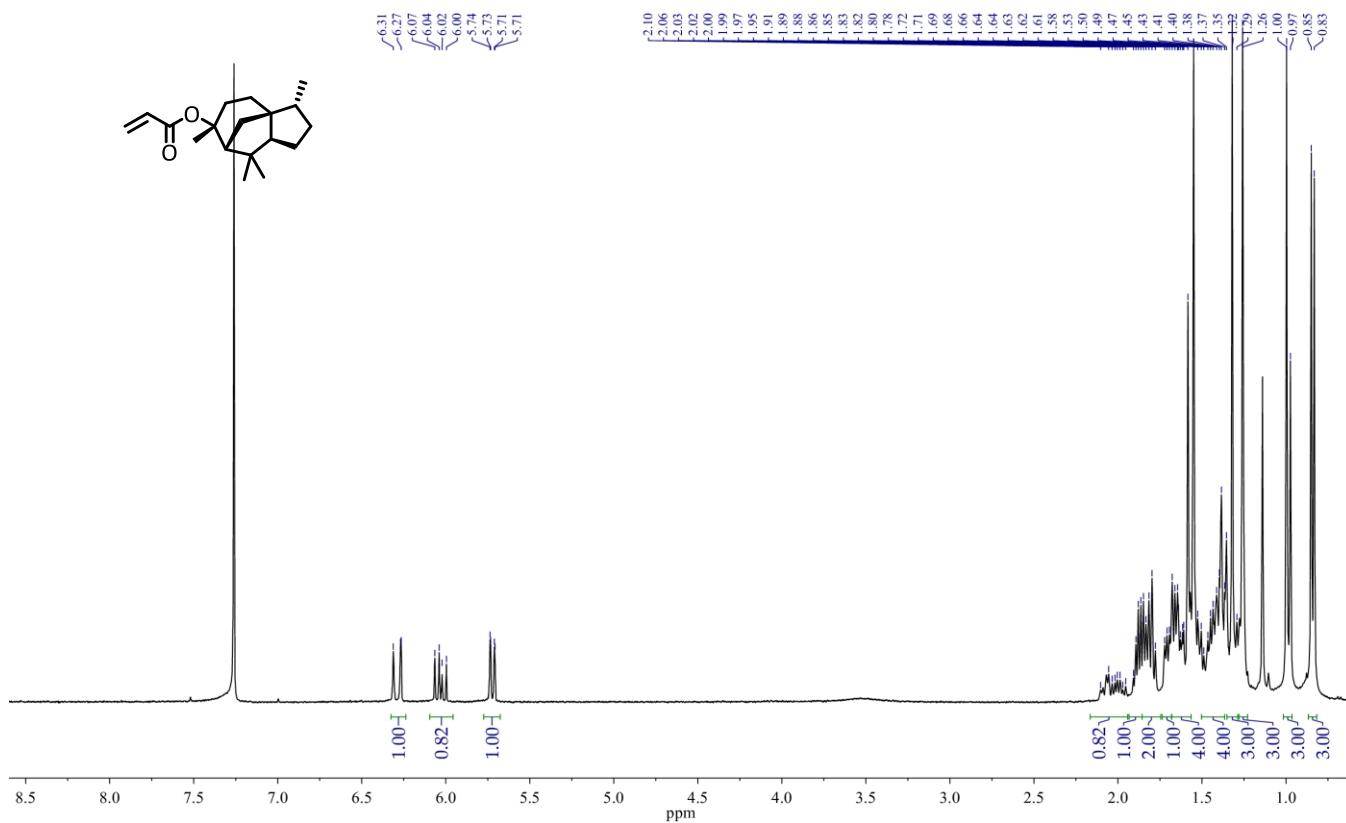

Figure S05.  $^1\text{H}$  NMR spectrum of the compound **2e**,  $\text{CDCl}_3$ , 298 K, 400 MHz.

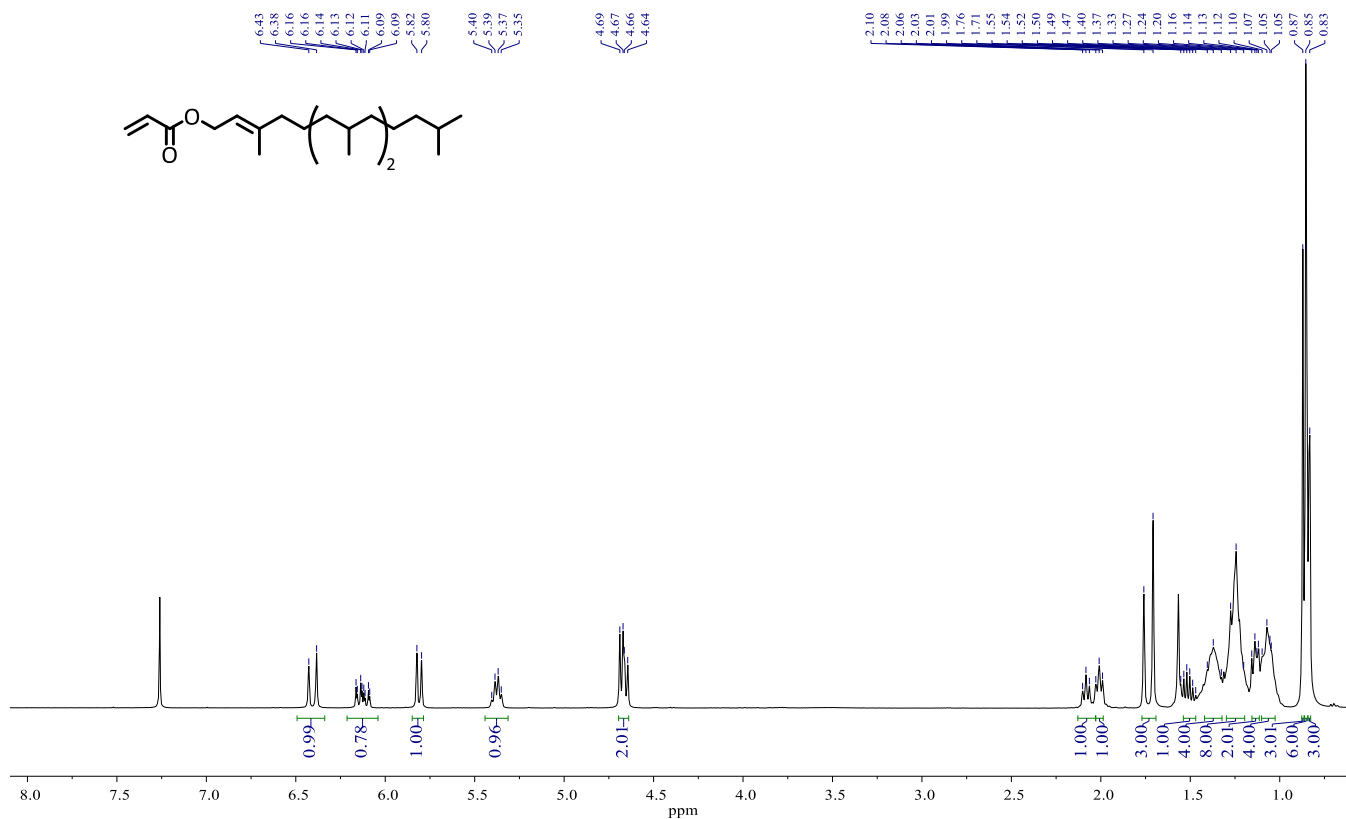

Figure S06.  $^1\text{H}$  NMR spectrum of the compound **2f**,  $\text{CDCl}_3$ , 298 K, 400 MHz.

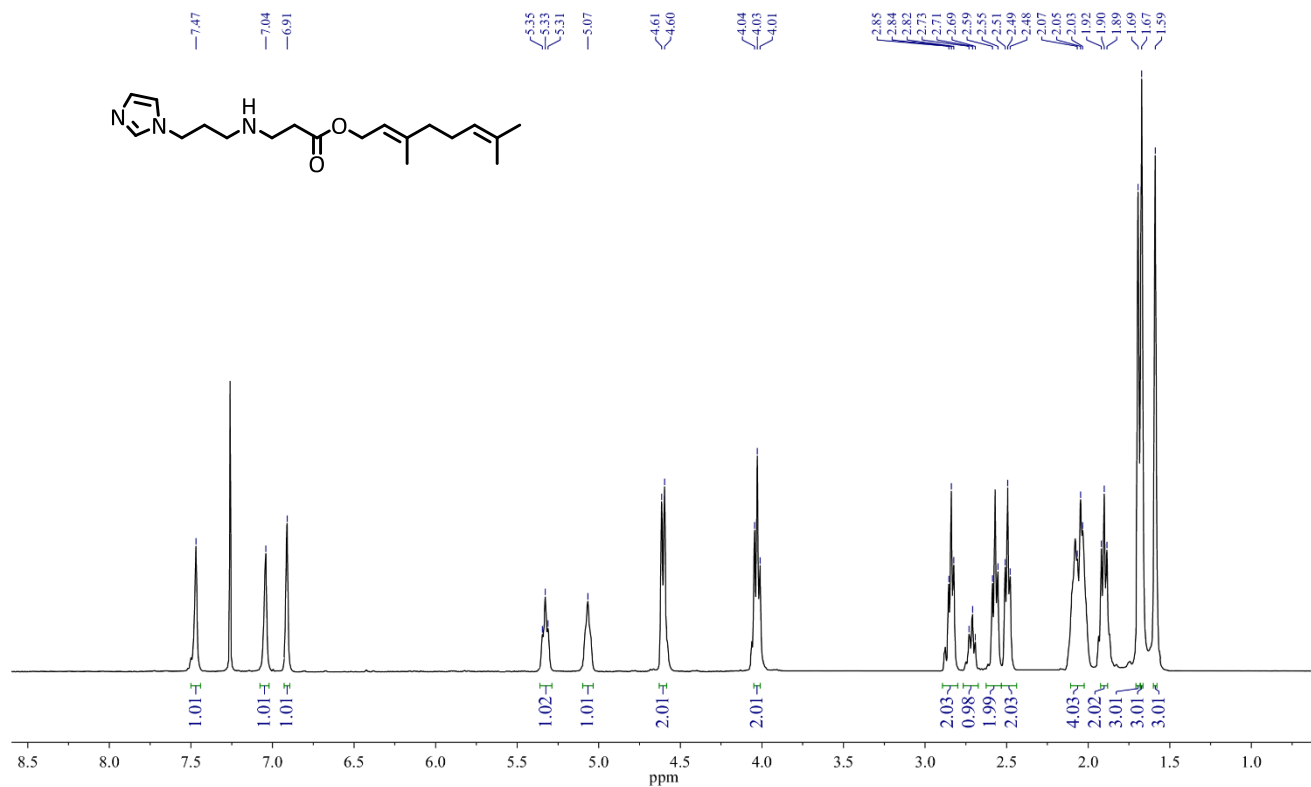

Figure S07. <sup>1</sup>H NMR spectrum of the compound **3a**, CDCl<sub>3</sub>, 298 K, 400 MHz.

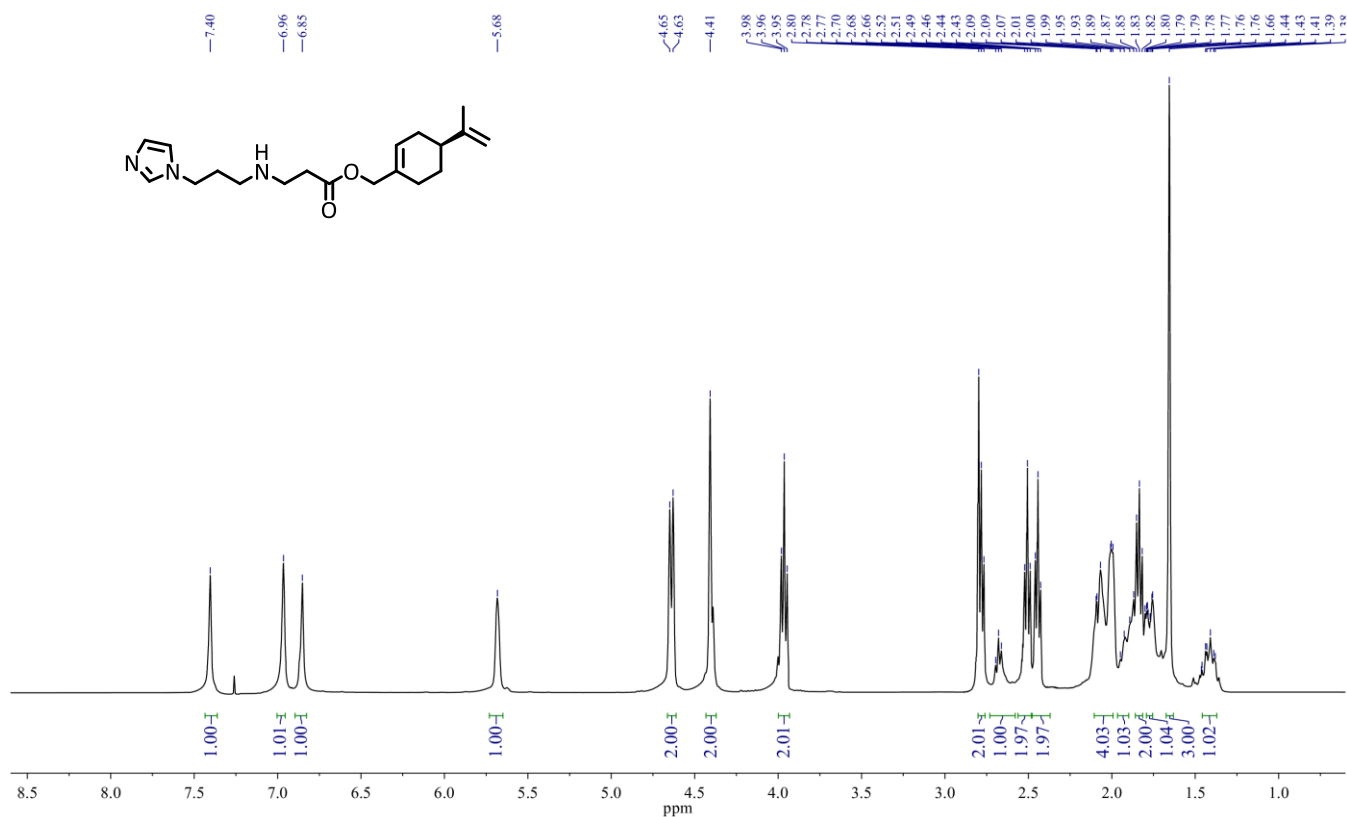

Figure S08. <sup>1</sup>H NMR spectrum of the compound **3b**, CDCl<sub>3</sub>, 298 K, 400 MHz.

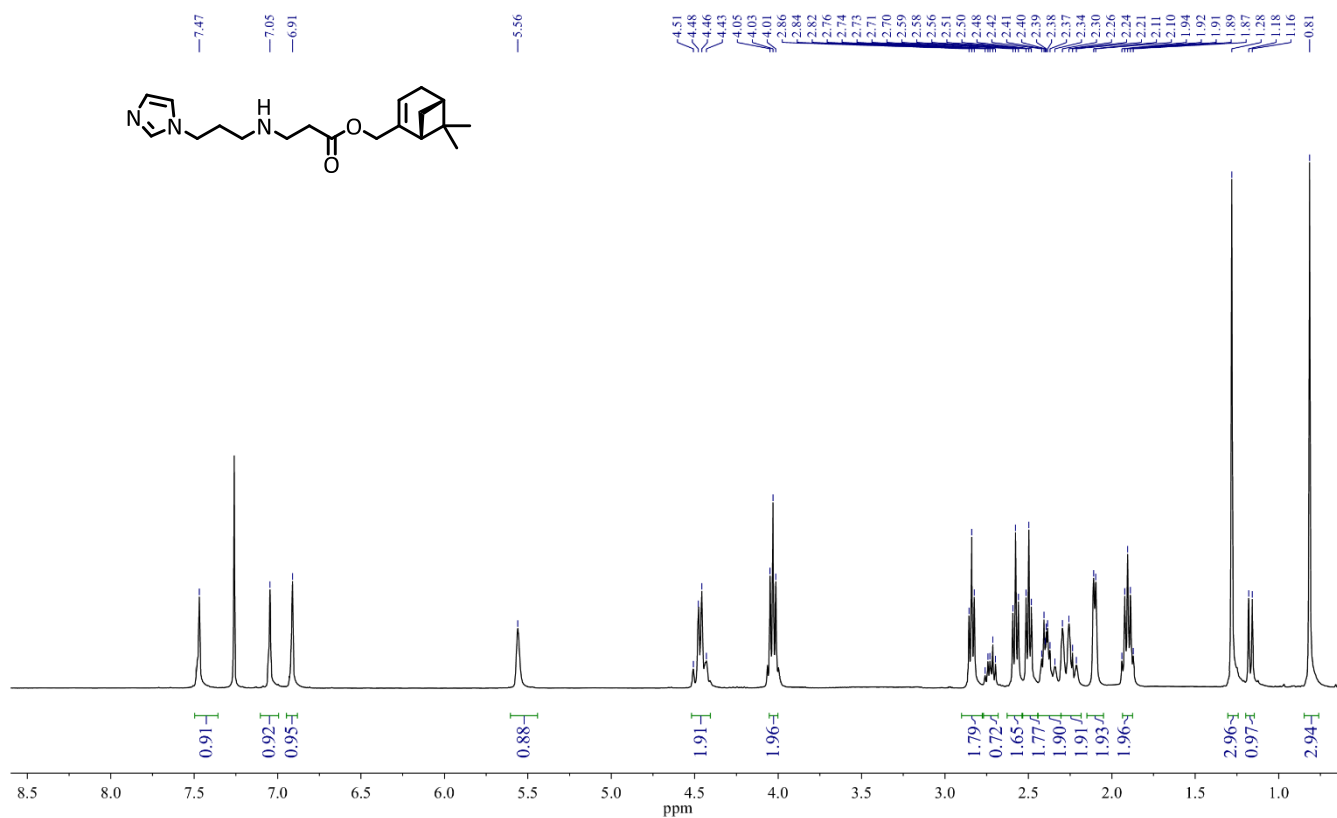

Figure S09. <sup>1</sup>H NMR spectrum of the compound **3c**, CDCl<sub>3</sub>, 298 K, 400 MHz.

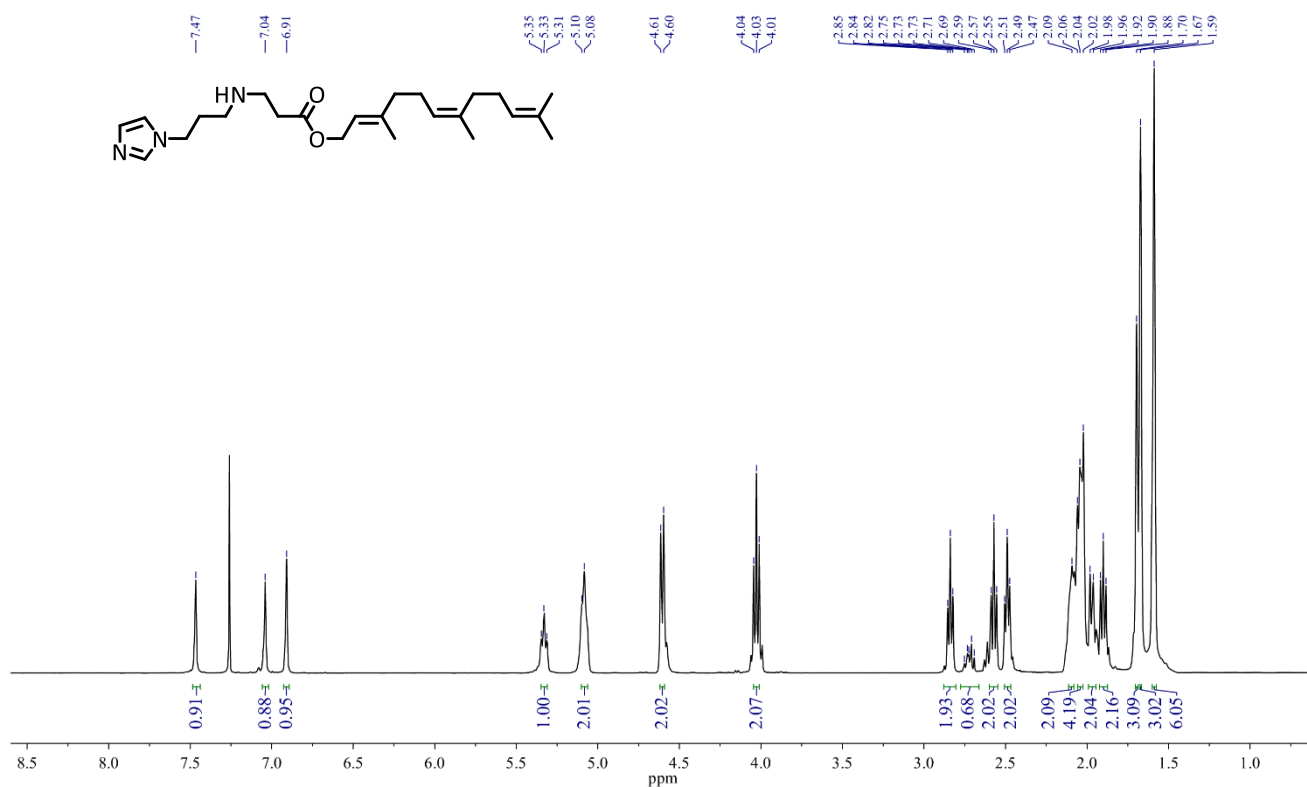

Figure S10. <sup>1</sup>H NMR spectrum of the compound **3d**, CDCl<sub>3</sub>, 298 K, 400 MHz.

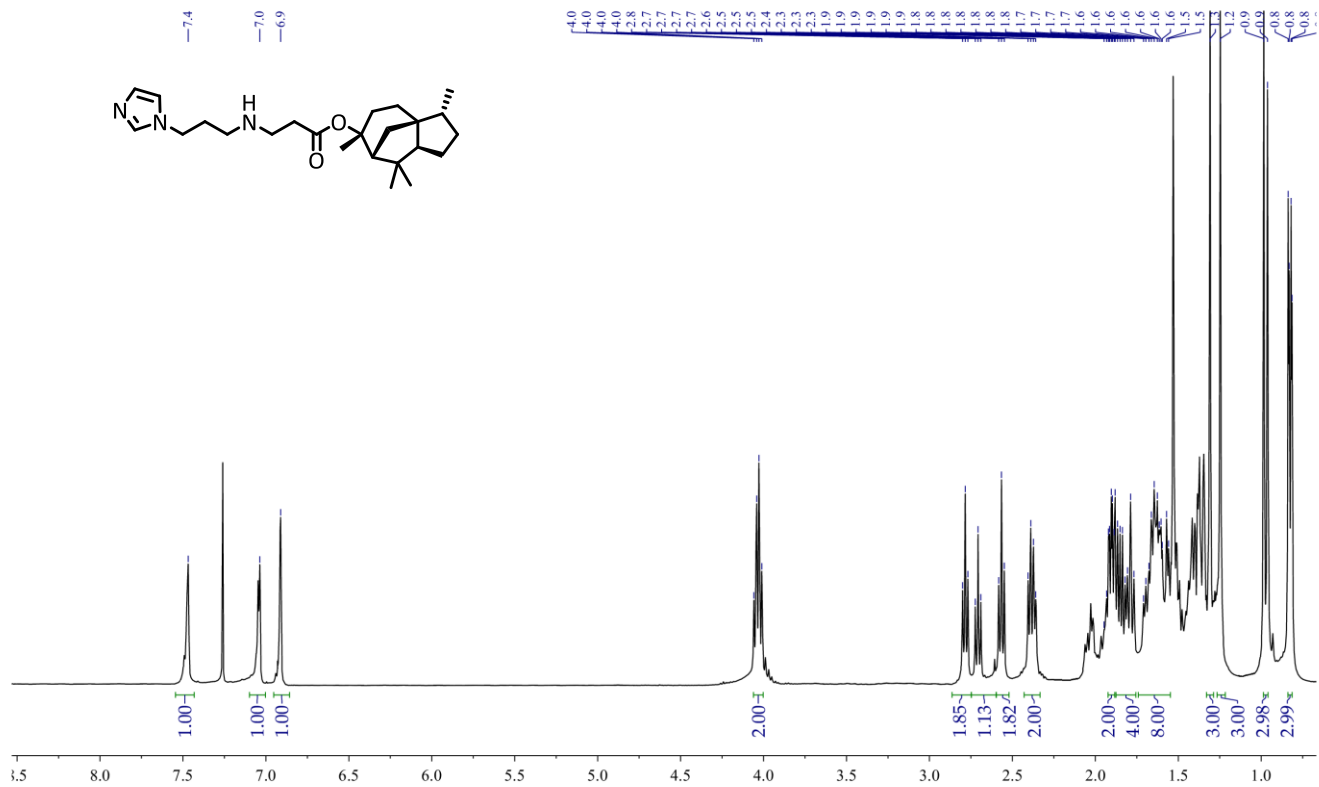

Figure S11. <sup>1</sup>H NMR spectrum of the compound **3e**, CDCl<sub>3</sub>, 298 K, 400 MHz.

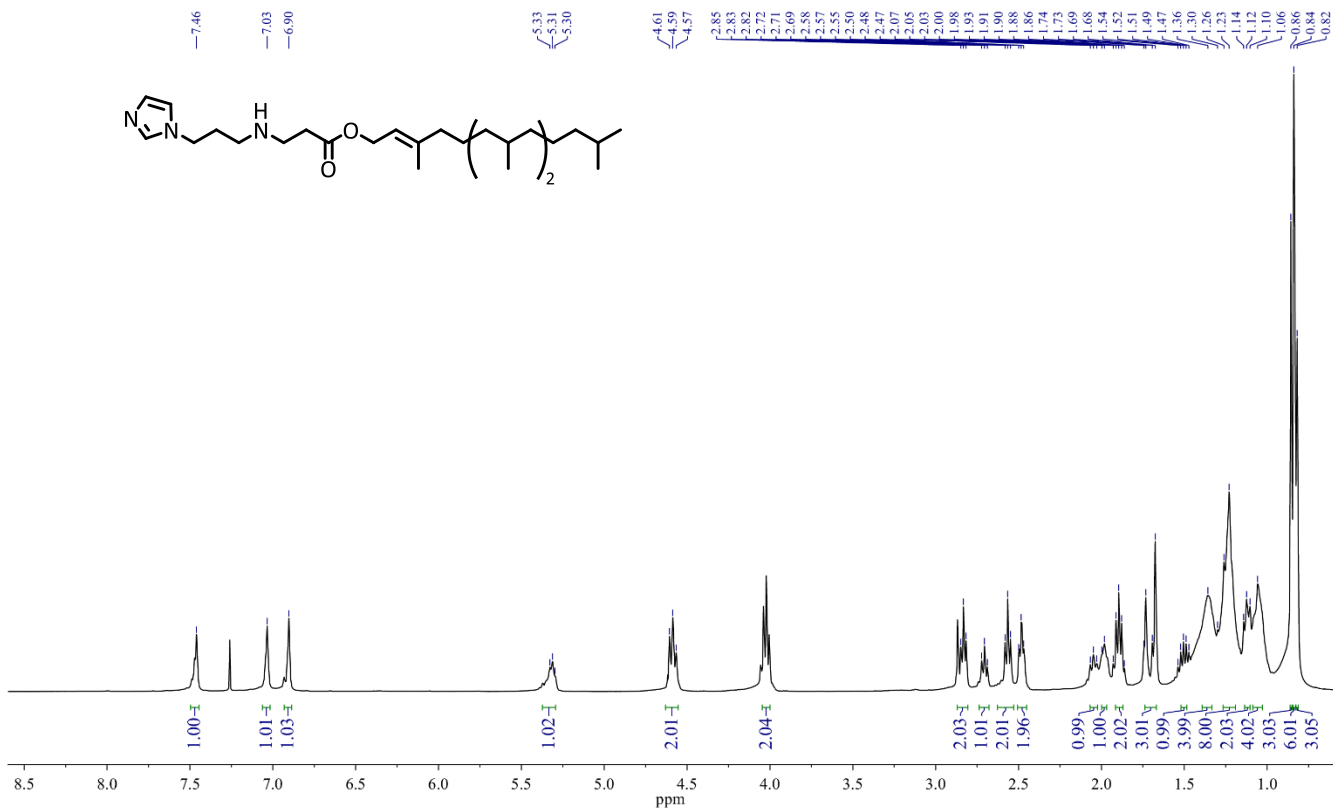

Figure S12. <sup>1</sup>H NMR spectrum of the compound **3f**, CDCl<sub>3</sub>, 298 K, 400 MHz.

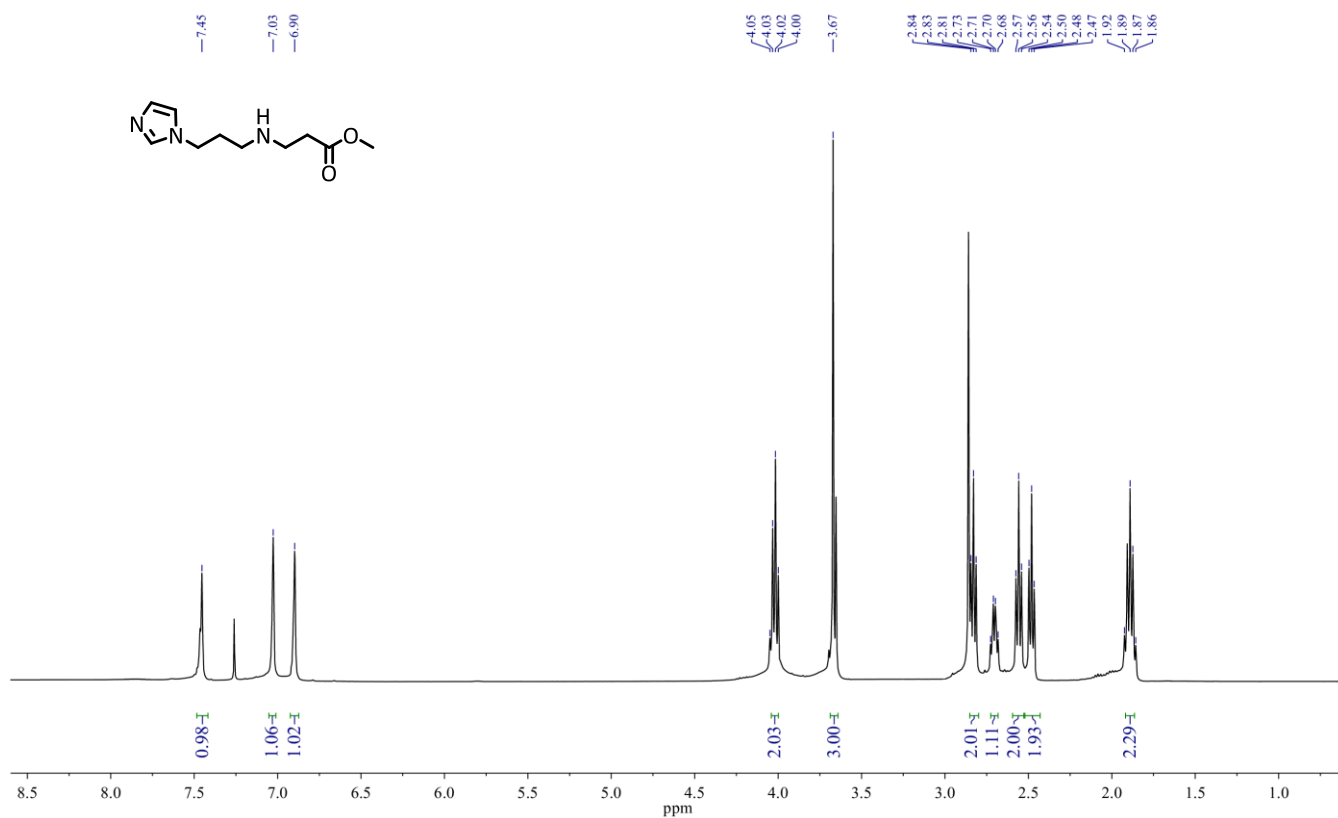

Figure S13. <sup>1</sup>H NMR spectrum of the compound **3g**, CDCl<sub>3</sub>, 298 K, 400 MHz.

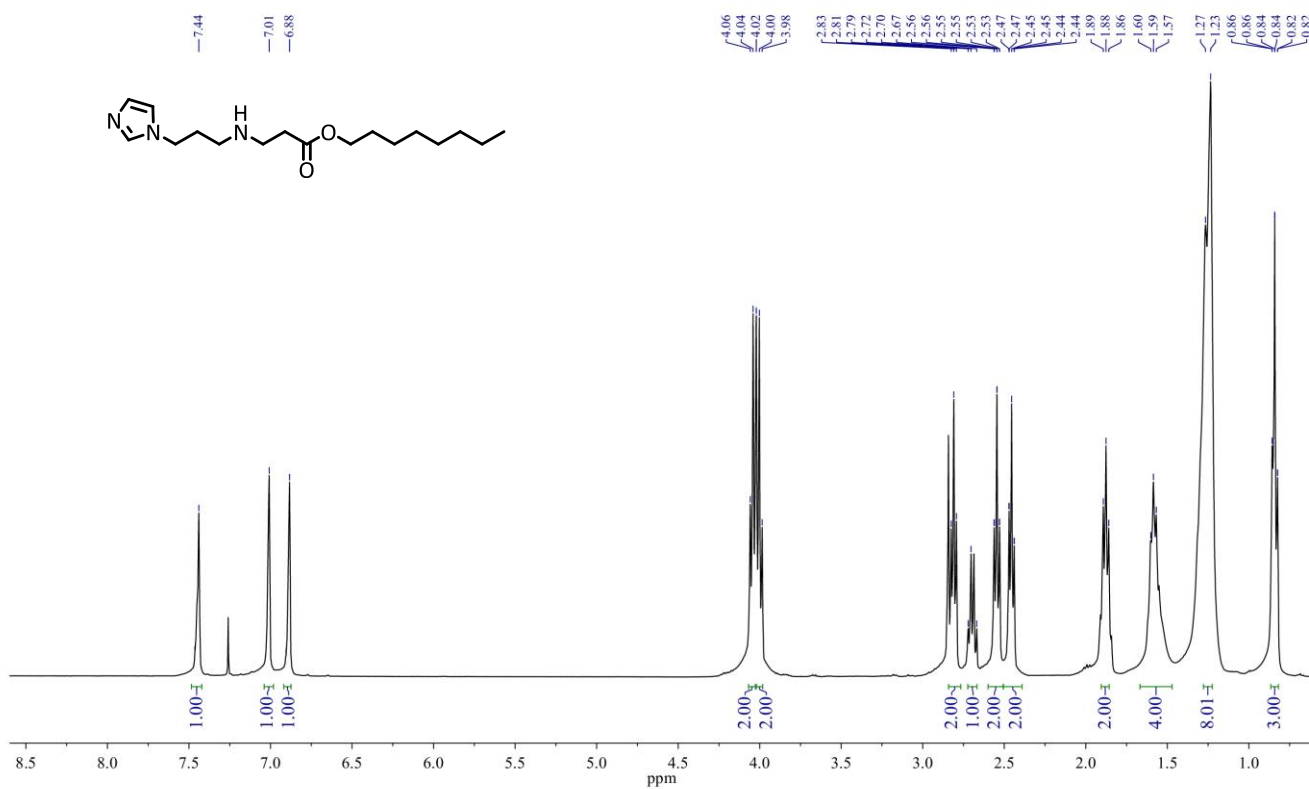

Figure S14. <sup>1</sup>H NMR spectrum of the compound **3h**, CDCl<sub>3</sub>, 298 K, 400 MHz.



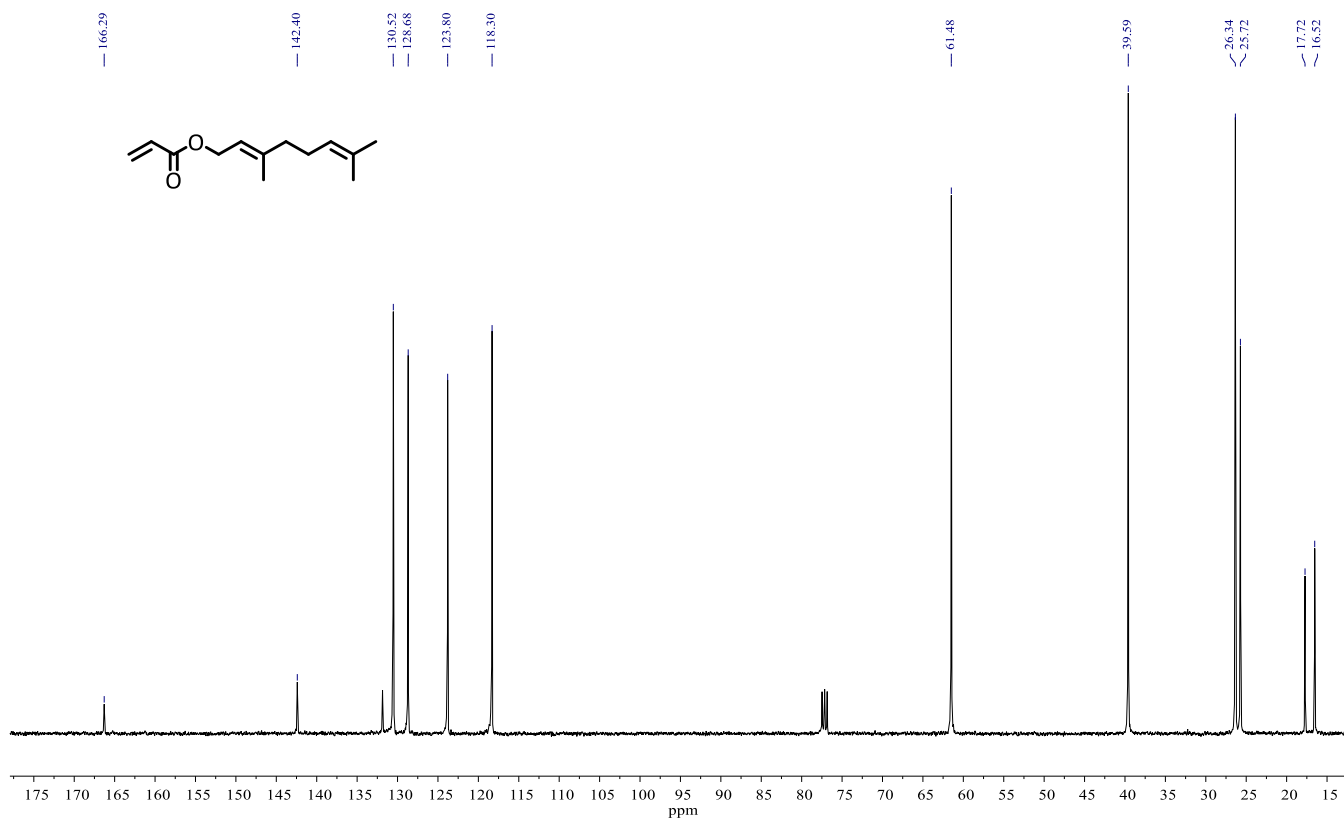

Figure S15. <sup>13</sup>C NMR spectrum of the compound **2a**, CDCl<sub>3</sub>, 298 K, 100 MHz.

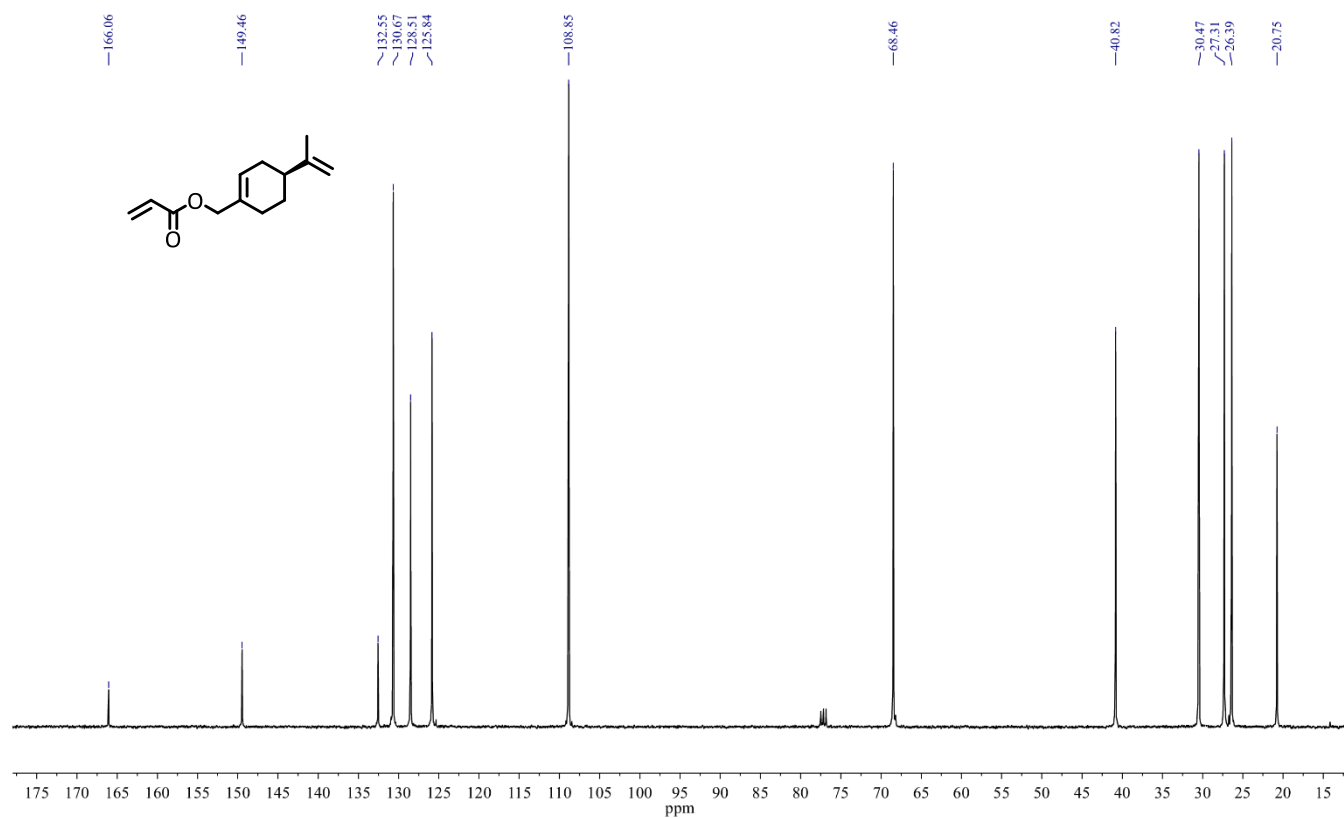

Figure S16. <sup>13</sup>C NMR spectrum of the compound **2b**, CDCl<sub>3</sub>, 298 K, 100 MHz.

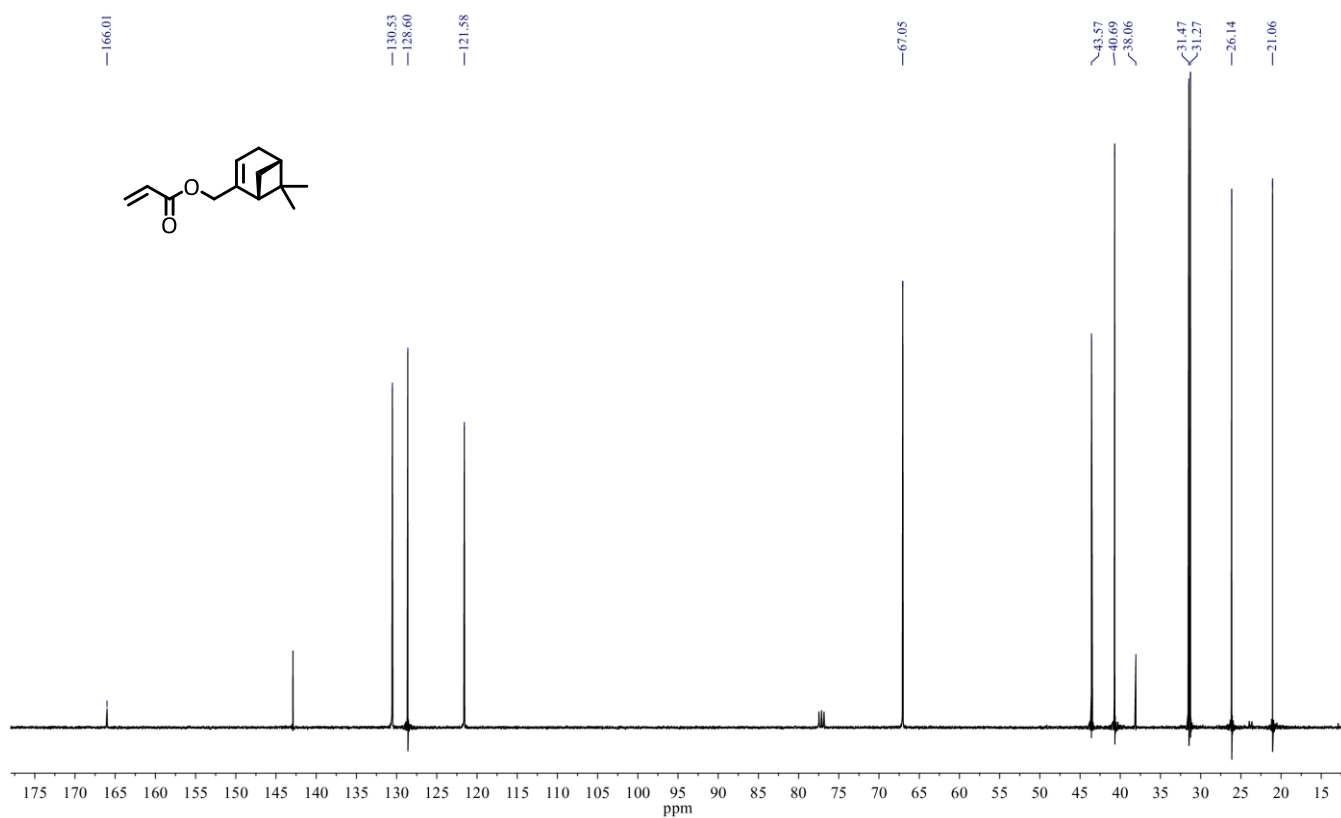

Figure S17.  $^{13}\text{C}$  NMR spectrum of the compound **2c**,  $\text{CDCl}_3$ , 298 K, 100 MHz.

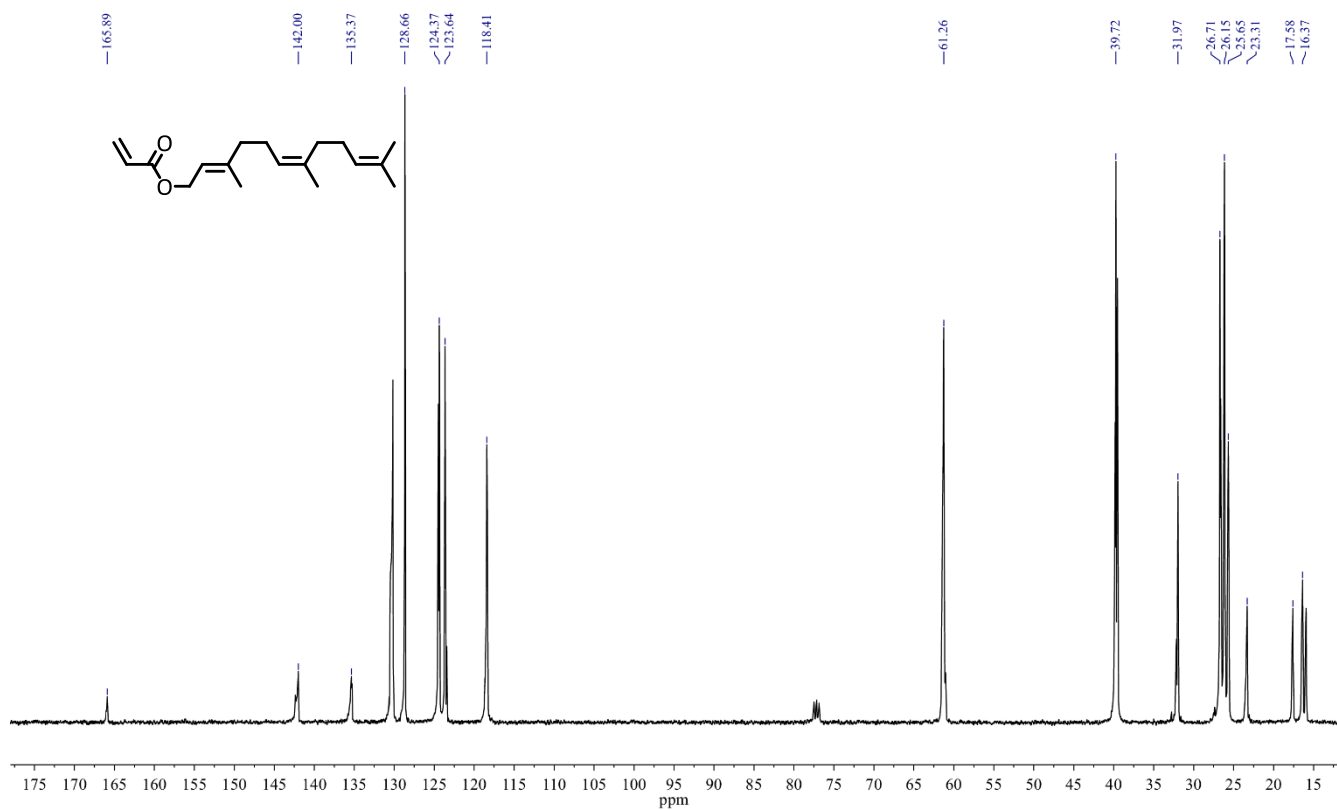

Figure S18.  $^{13}\text{C}$  NMR spectrum of the compound **2d**,  $\text{CDCl}_3$ , 298 K, 100 MHz.

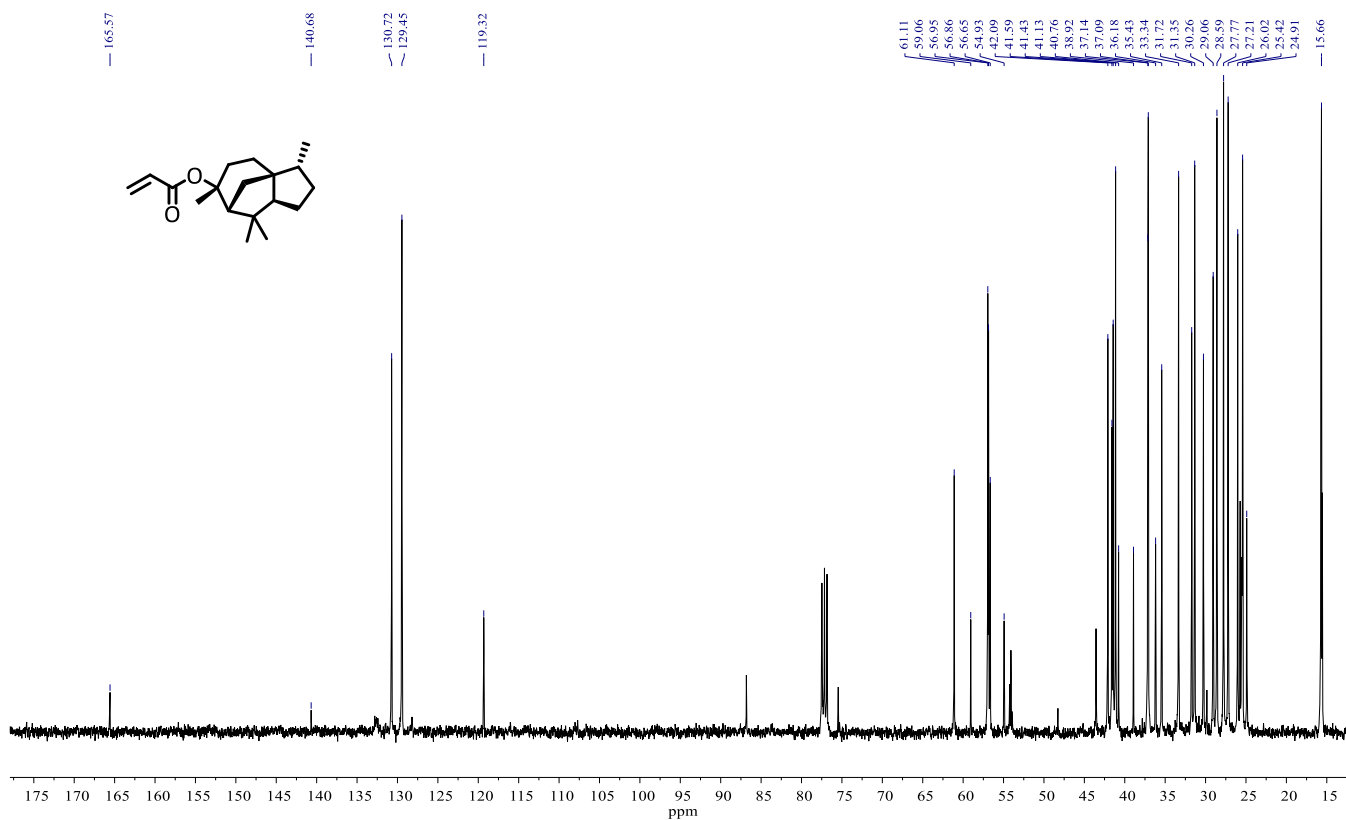

Figure S19.  $^{13}\text{C}$  NMR spectrum of the compound **2e**,  $\text{CDCl}_3$ , 298 K, 100 MHz.

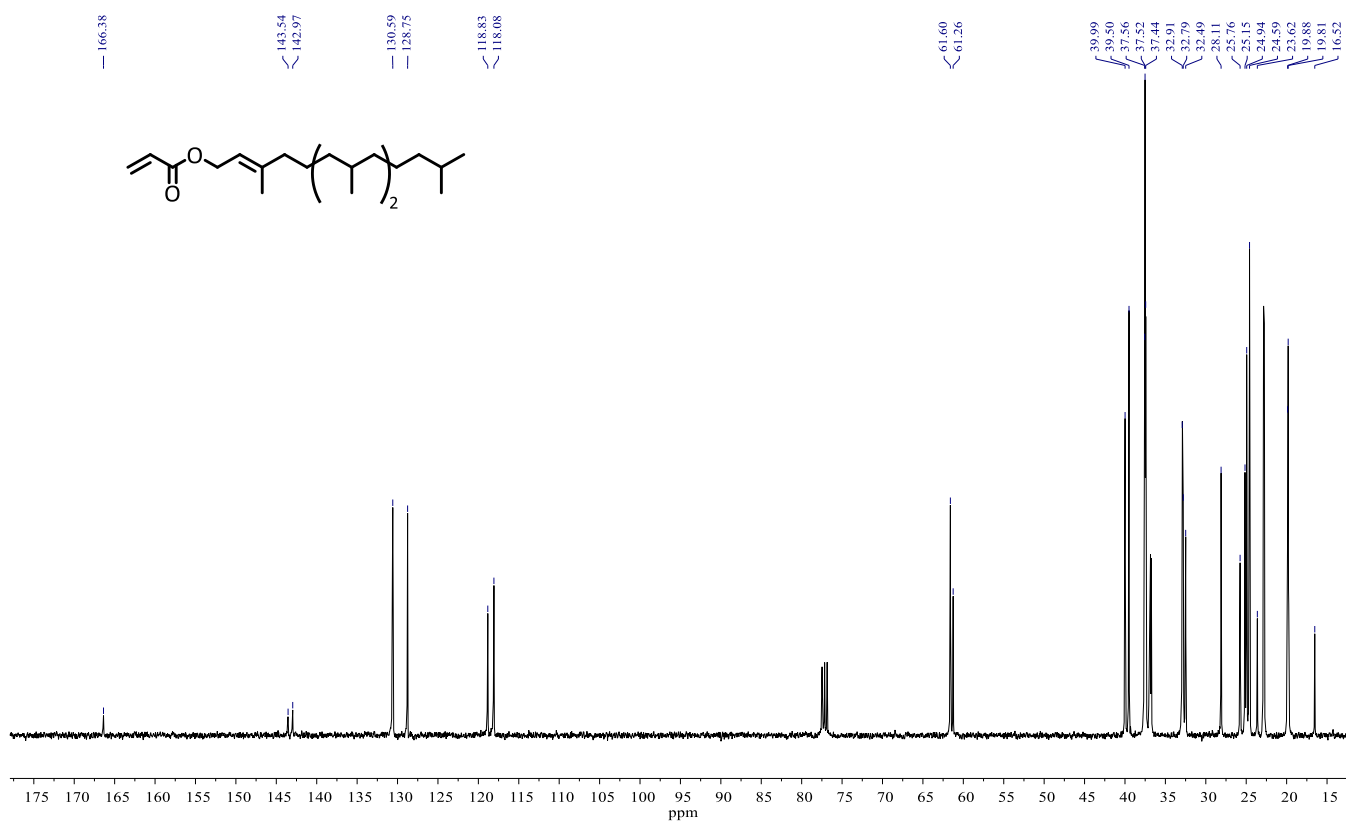

Figure S20.  $^{13}\text{C}$  NMR spectrum of the compound **2f**,  $\text{CDCl}_3$ , 298 K, 100 MHz.

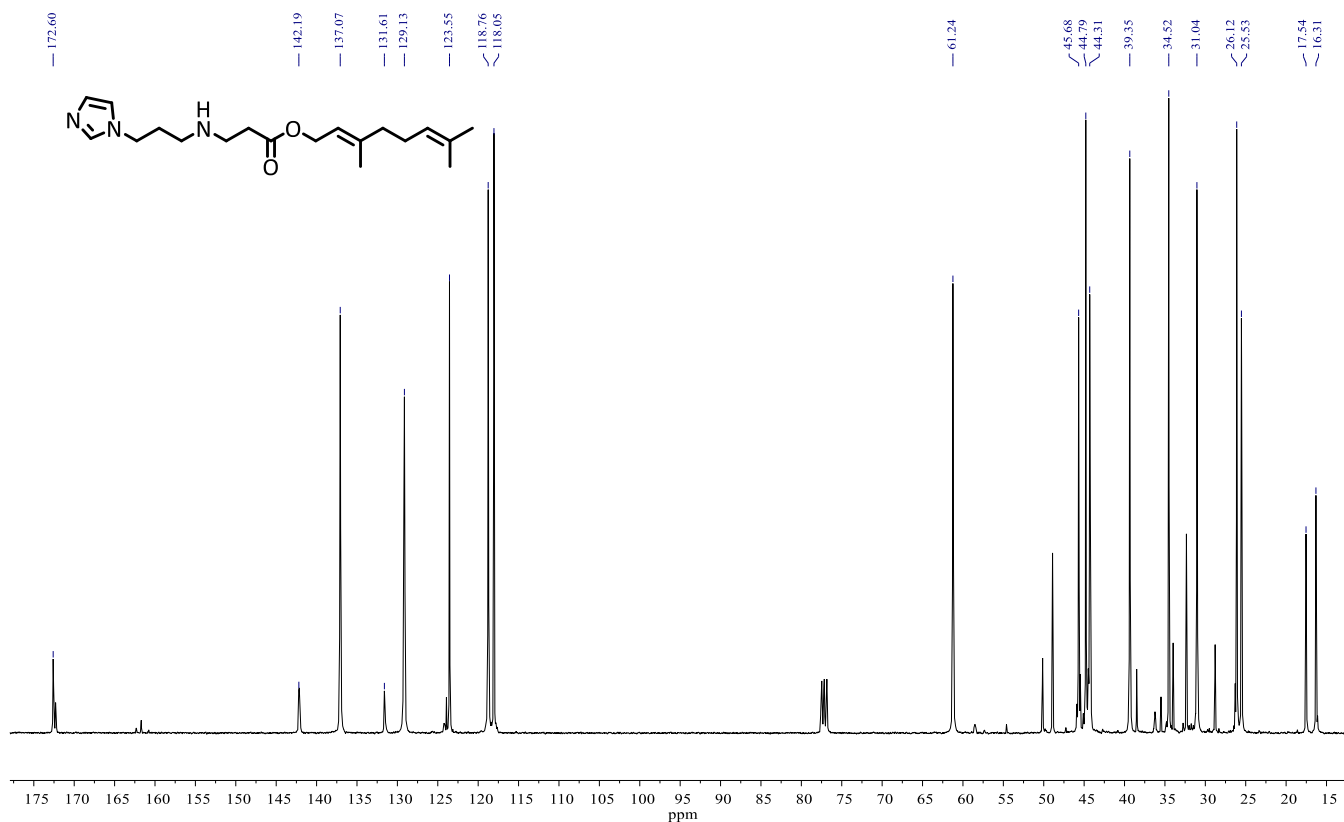

Figure S21. <sup>13</sup>C NMR spectrum of the compound **3a**, CDCl<sub>3</sub>, 298 K, 100 MHz.

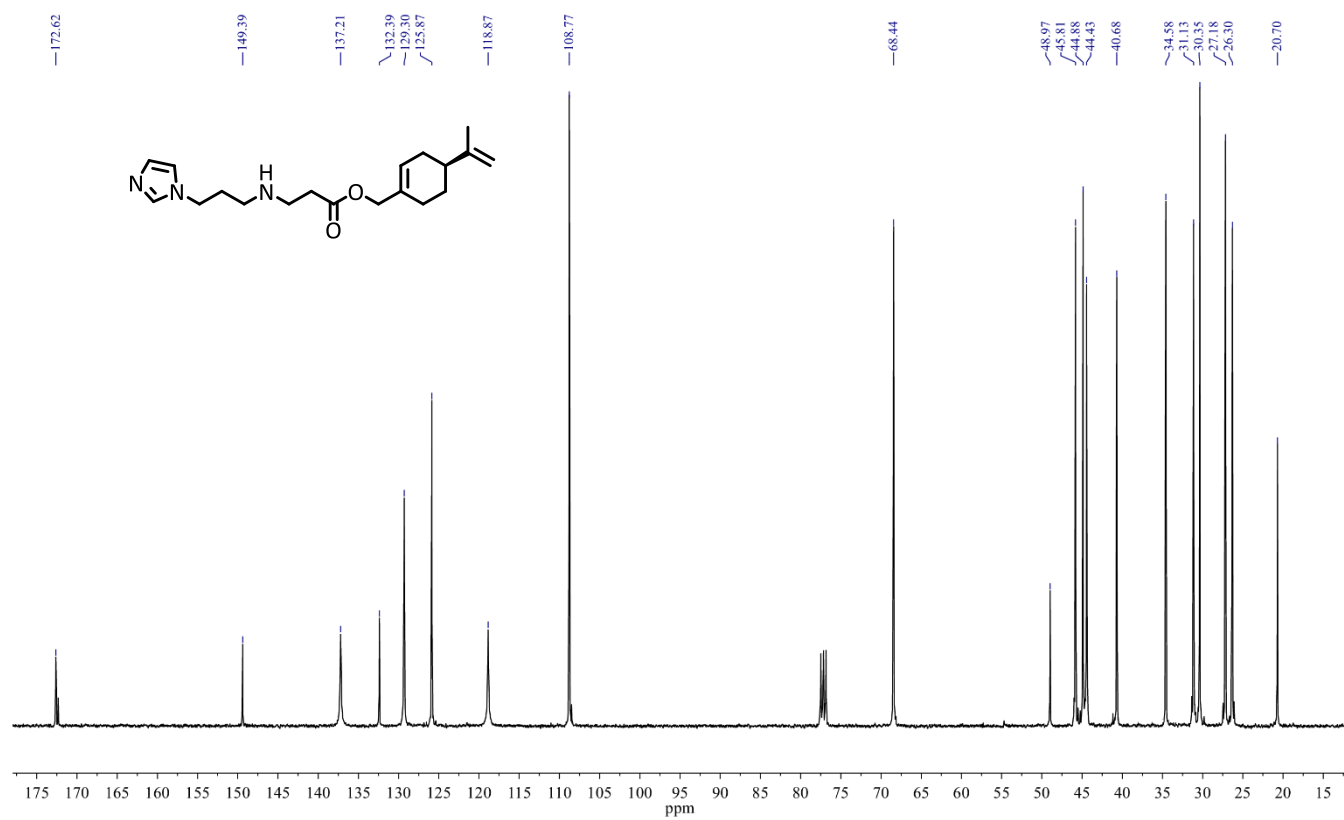

Figure S22. <sup>13</sup>C NMR spectrum of the compound **3b**, CDCl<sub>3</sub>, 298 K, 100 MHz.

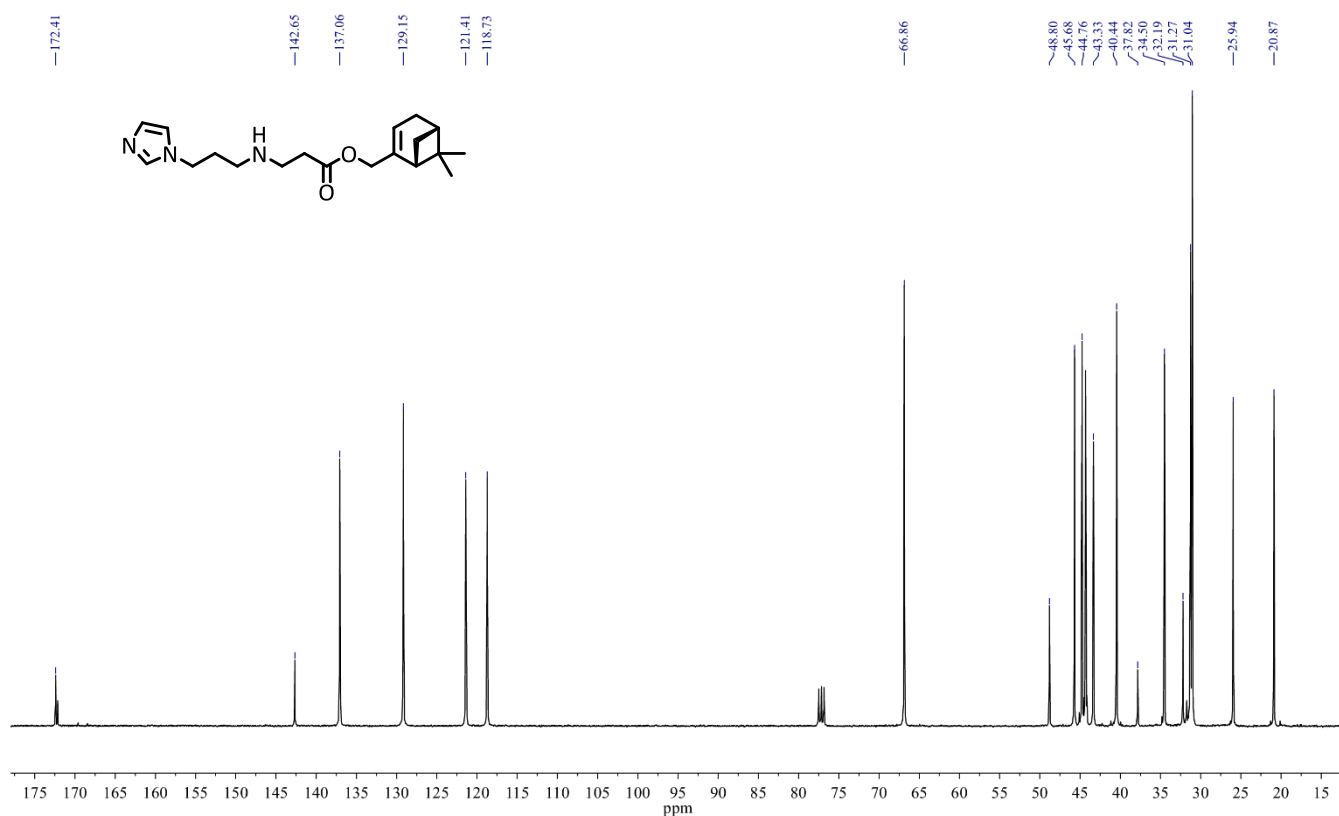

Figure S23.  $^{13}\text{C}$  NMR spectrum of the compound **3c**,  $\text{CDCl}_3$ , 298 K, 100 MHz.

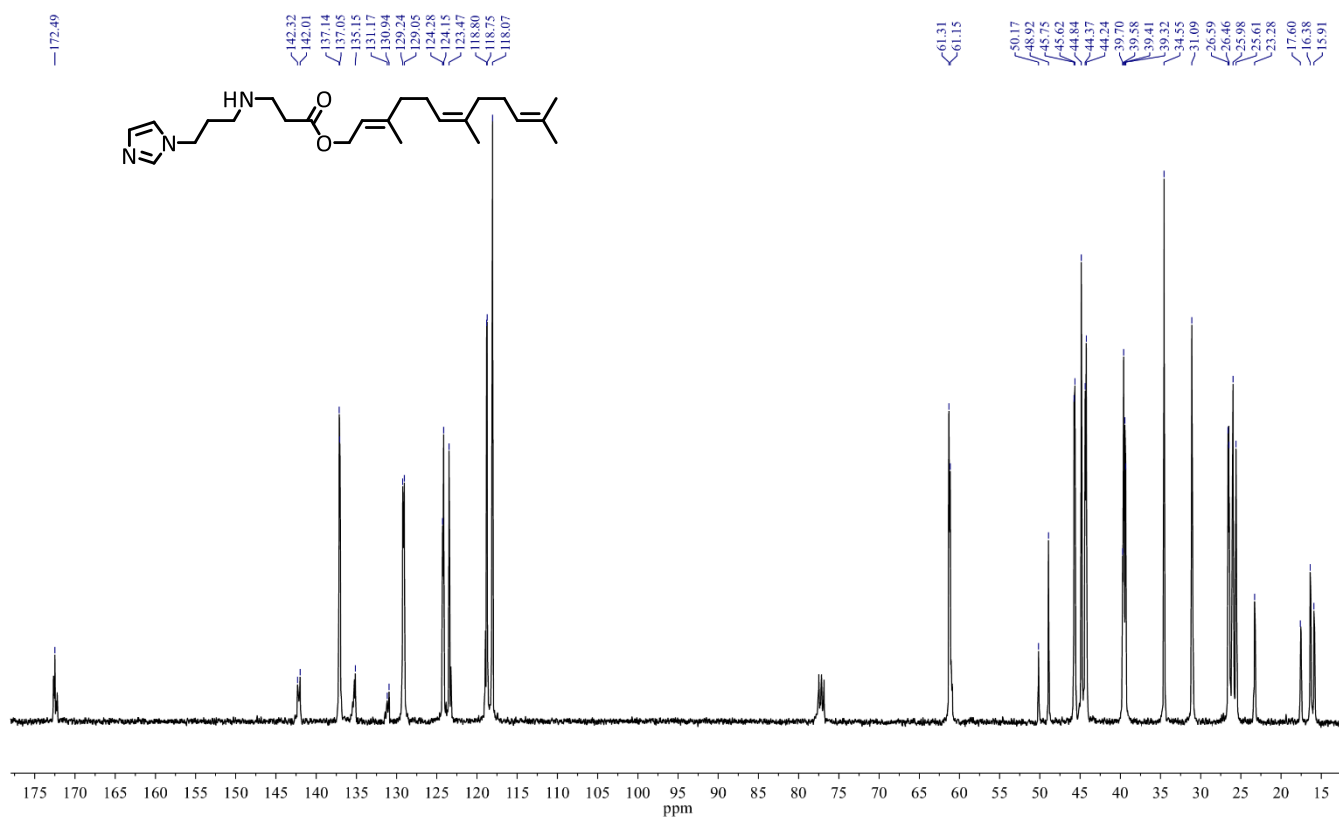

Figure S24.  $^{13}\text{C}$  NMR spectrum of the compound **3d**,  $\text{CDCl}_3$ , 298 K, 100 MHz.

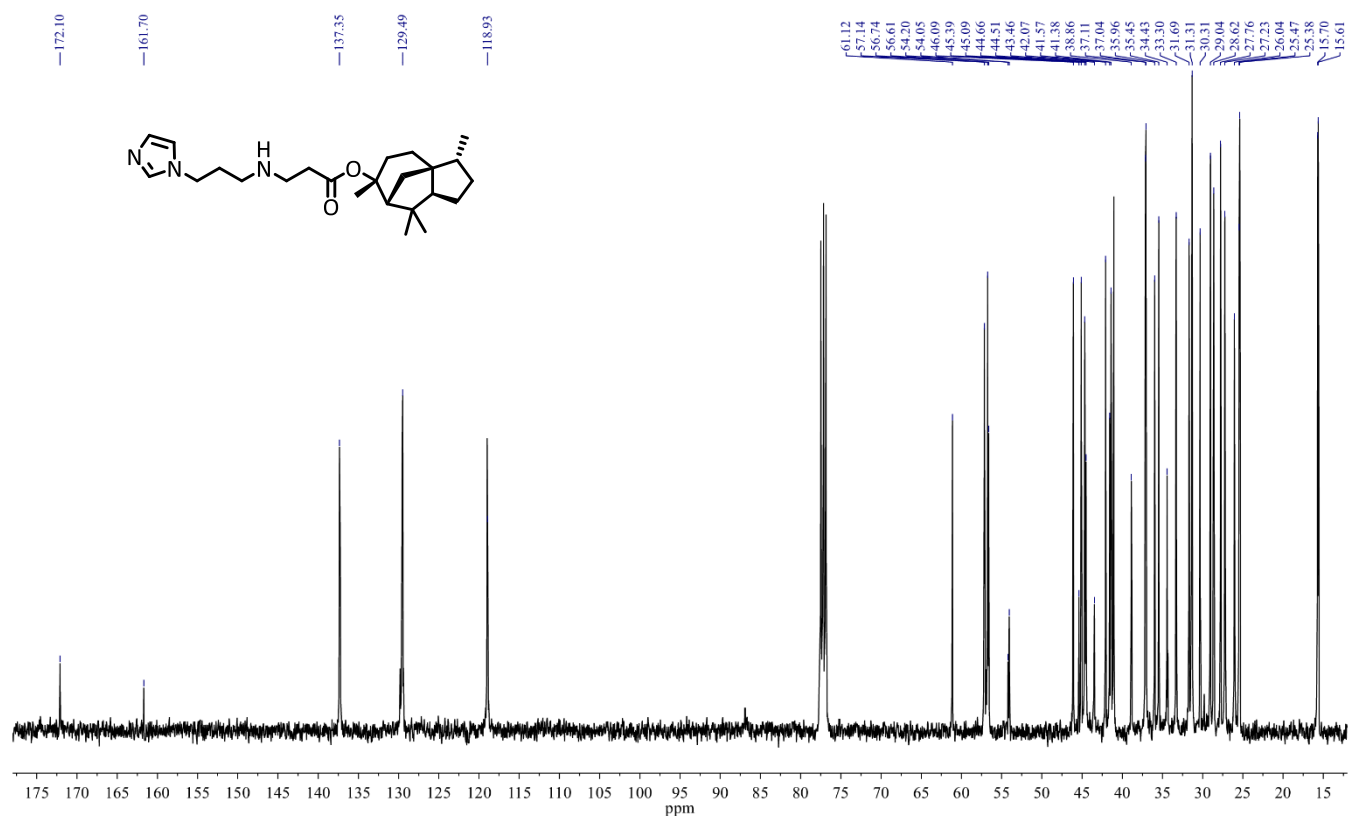

Figure S25. <sup>13</sup>C NMR spectrum of the compound **3e**, CDCl<sub>3</sub>, 298 K, 100 MHz.

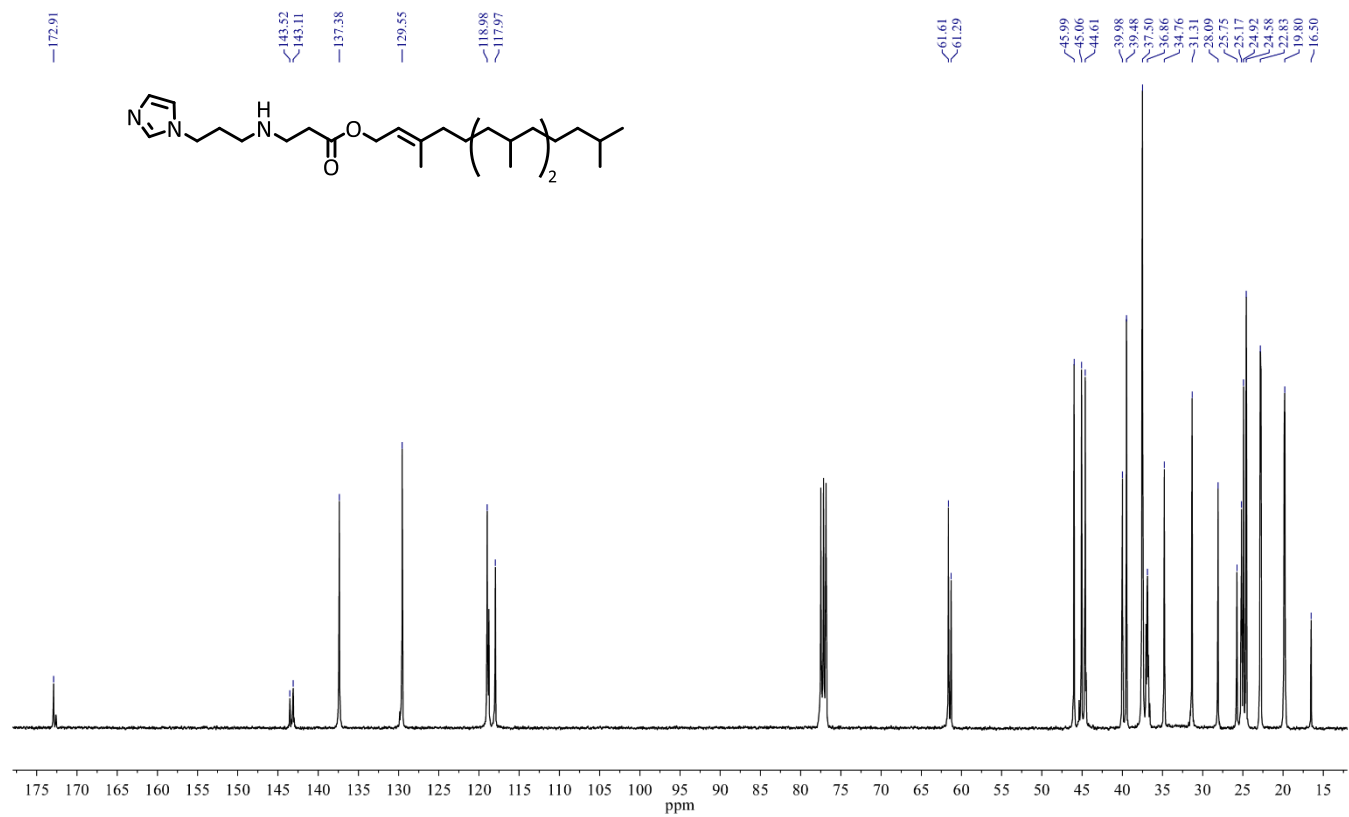

Figure S26. <sup>13</sup>C NMR spectrum of the compound **3f**, CDCl<sub>3</sub>, 298 K, 100 MHz.

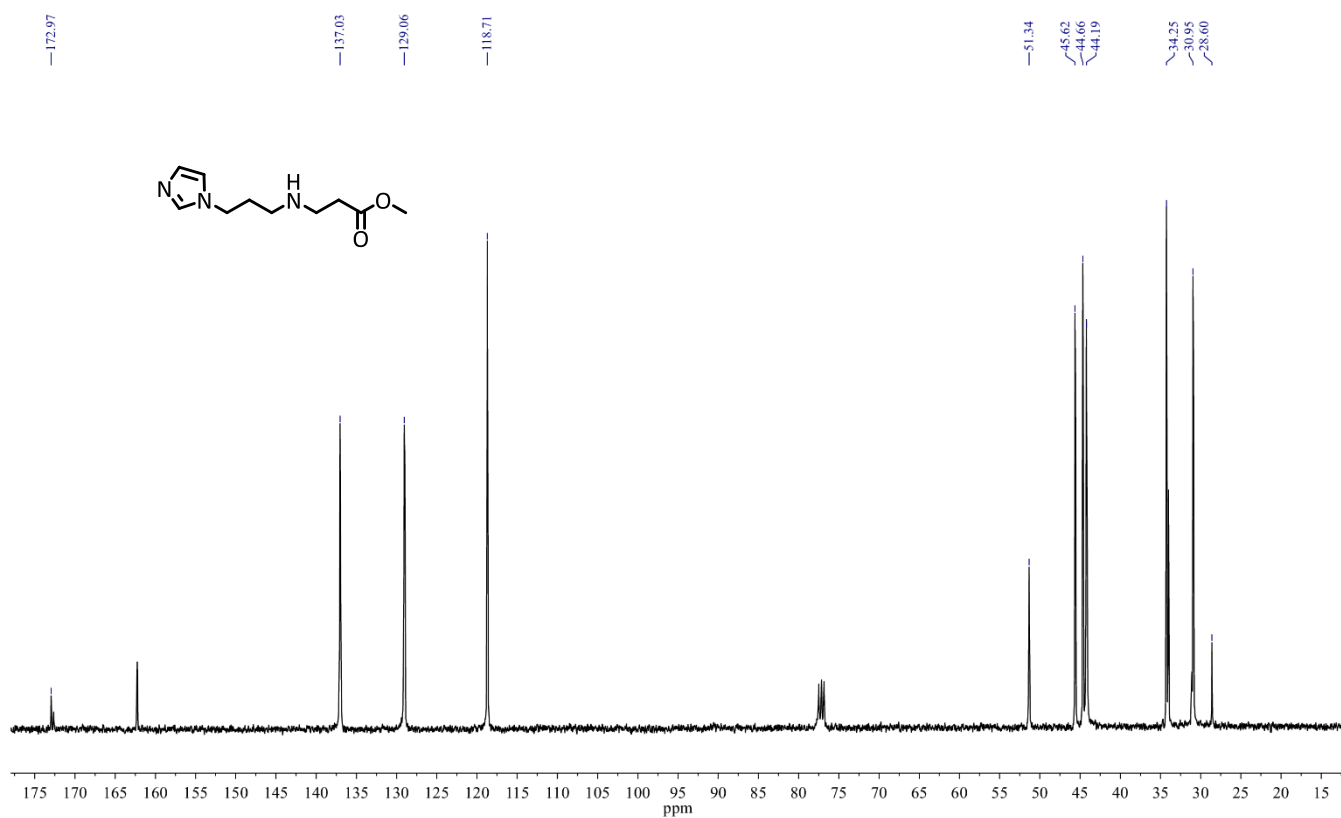

Figure S27.  $^{13}\text{C}$  NMR spectrum of the compound **3g**,  $\text{CDCl}_3$ , 298 K, 100 MHz.

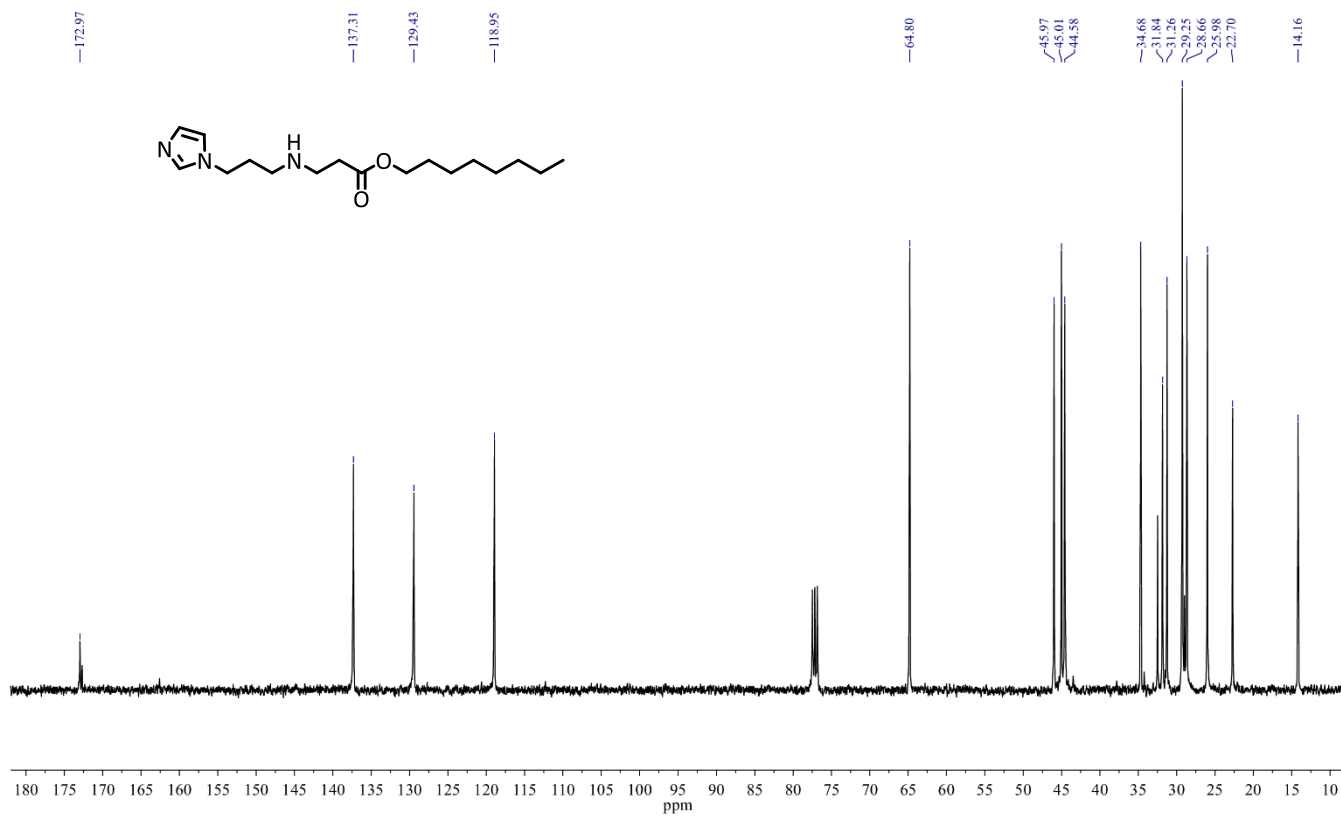

Figure S28.  $^{13}\text{C}$  NMR spectrum of the compound **3h**,  $\text{CDCl}_3$ , 298 K, 100 MHz.

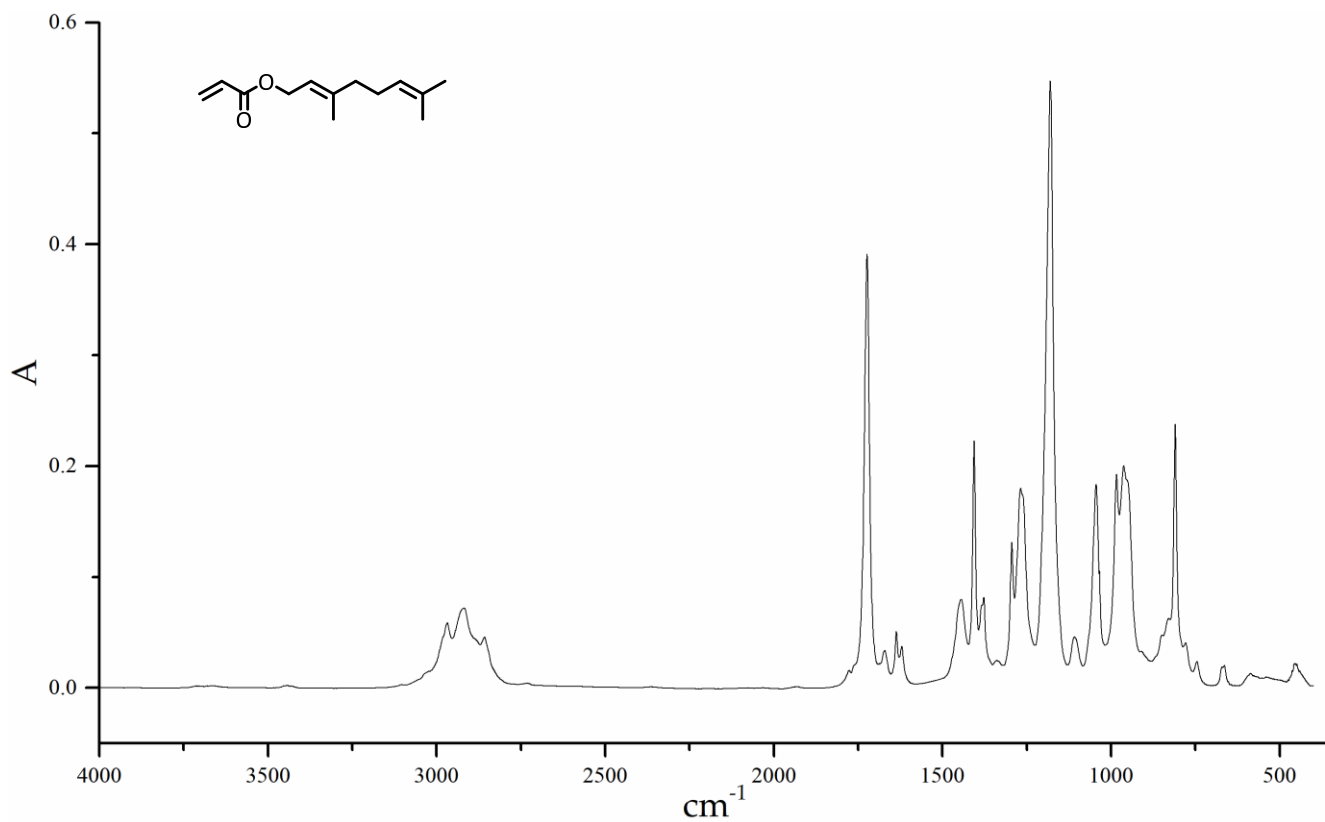

Figure S29. FT-IR spectrum of the compound **2a**.

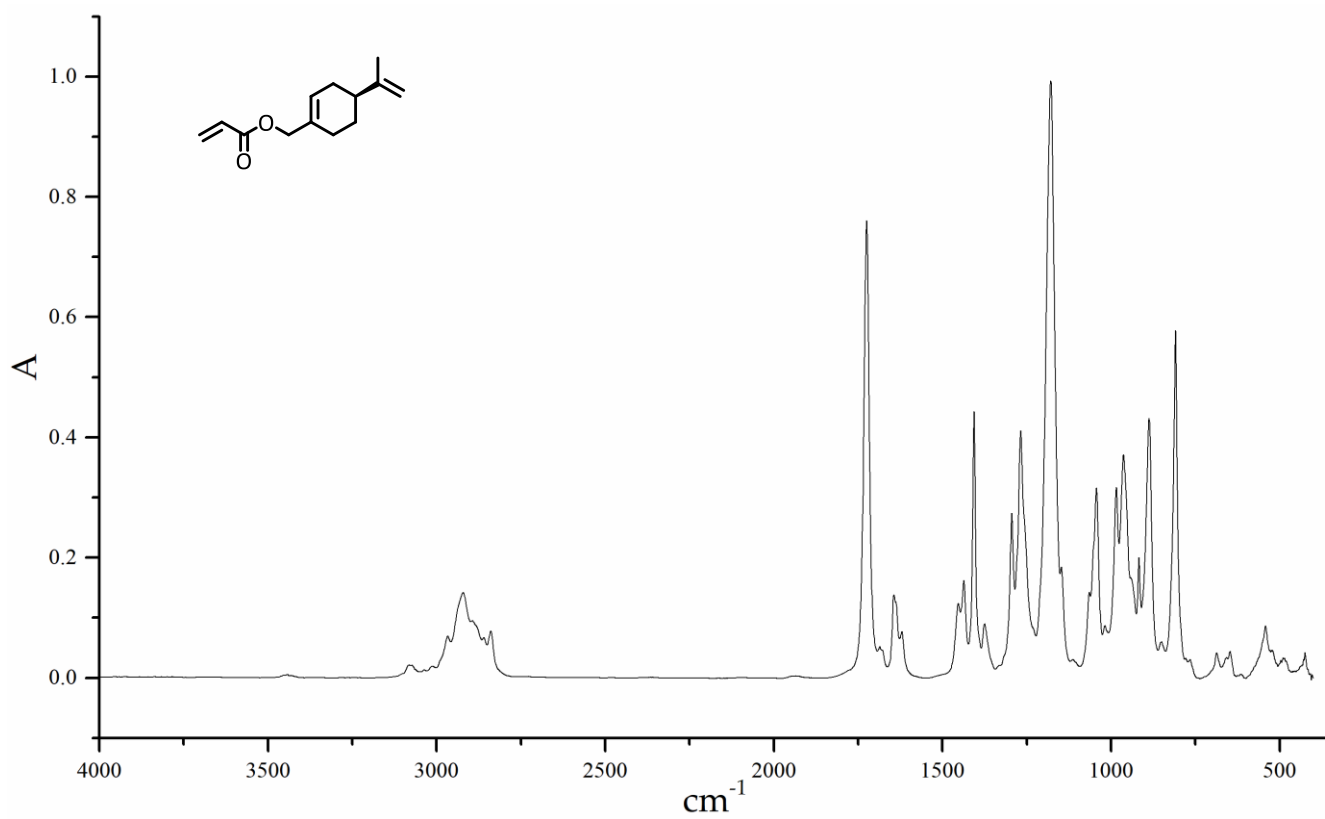

Figure S30. FT-IR spectrum of the compound **2b**.



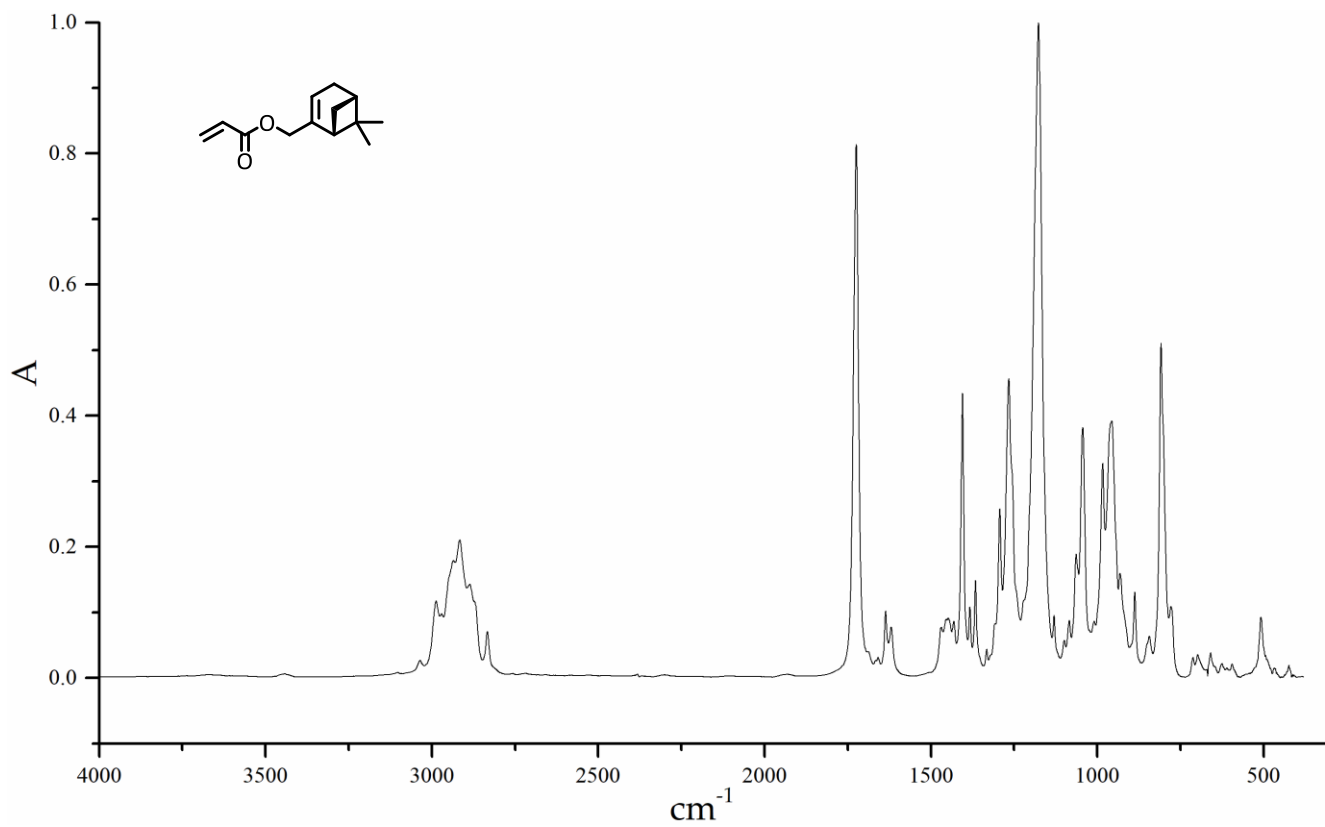

Figure S31. FT-IR spectrum of the compound **2c**.

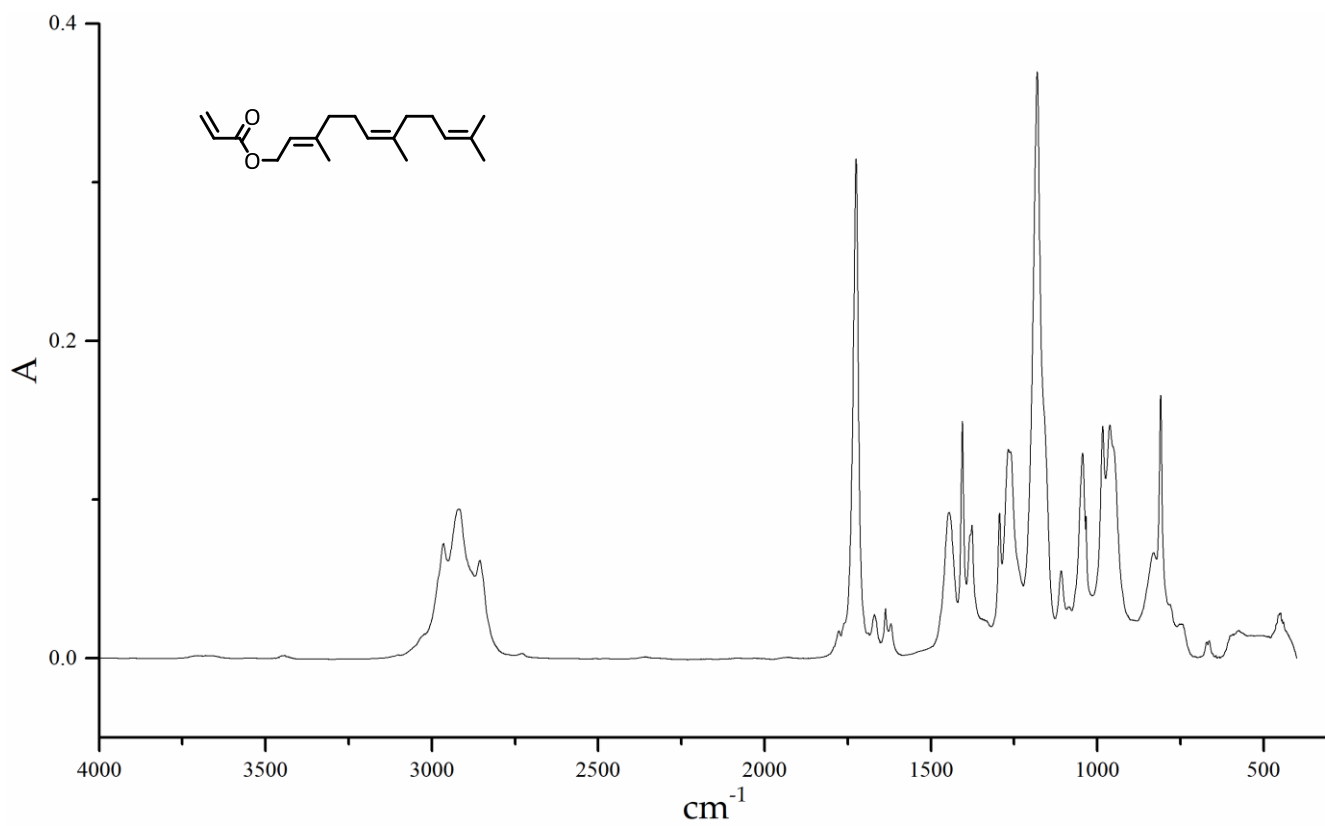

Figure S32. FT-IR spectrum of the compound **2d**.

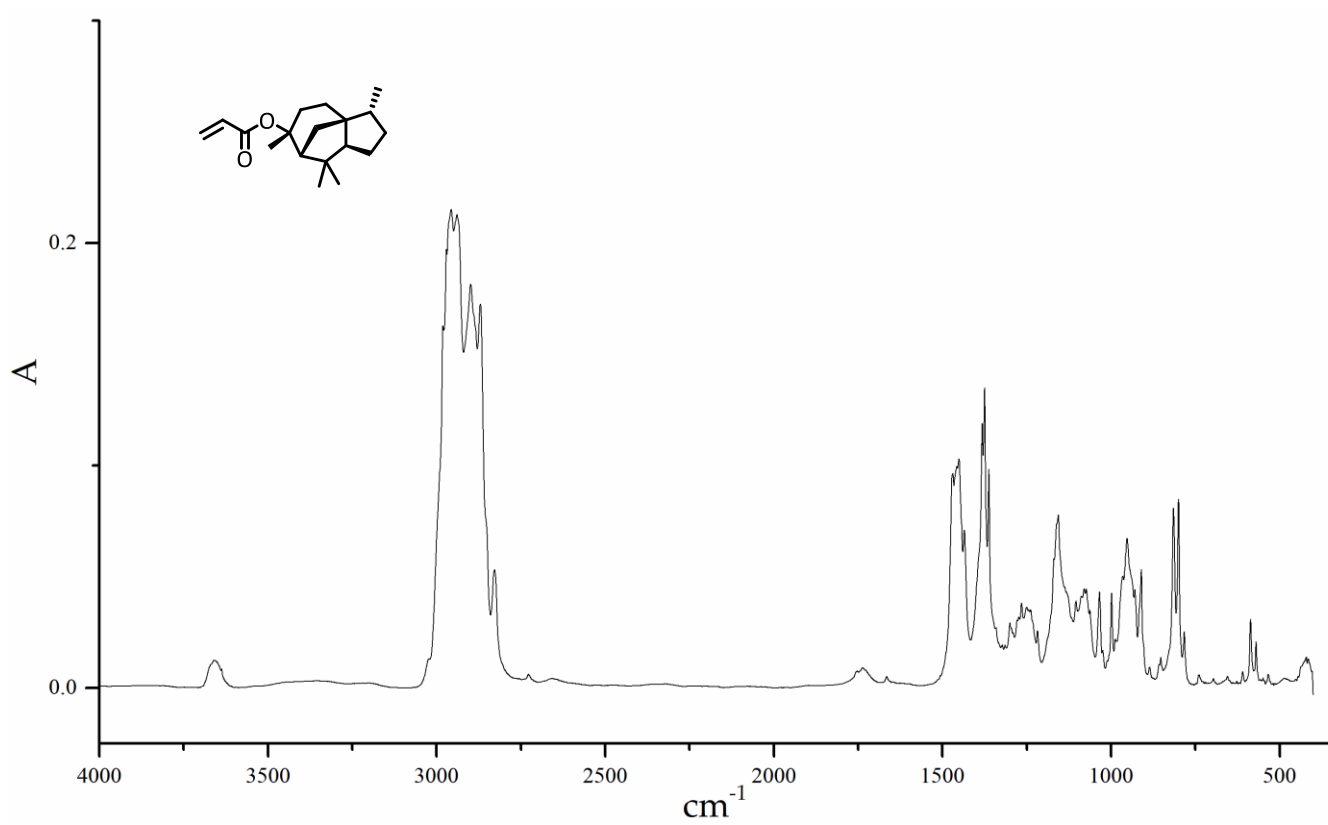

Figure S33. FT-IR spectrum of the compound **2e**.

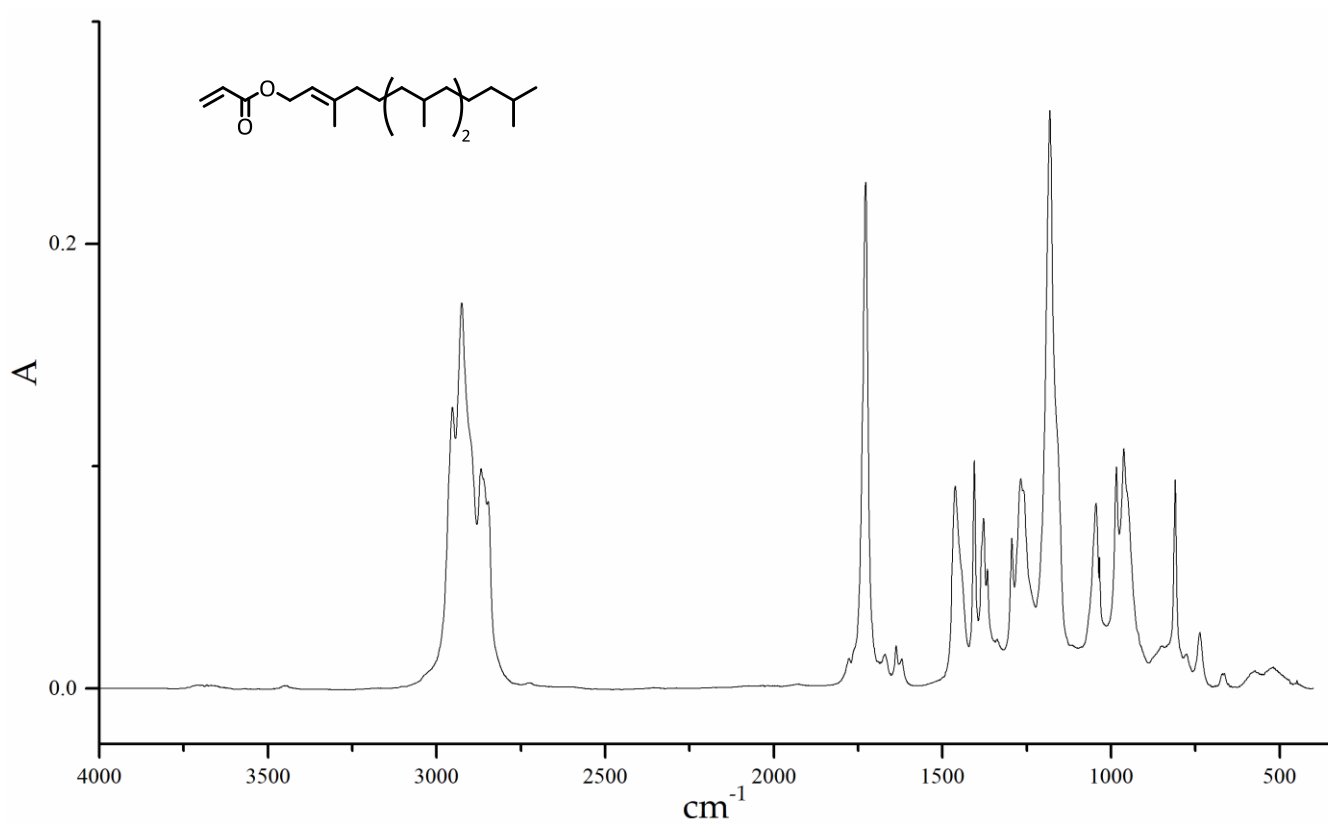

Figure S34. FT-IR spectrum of the compound **2f**.

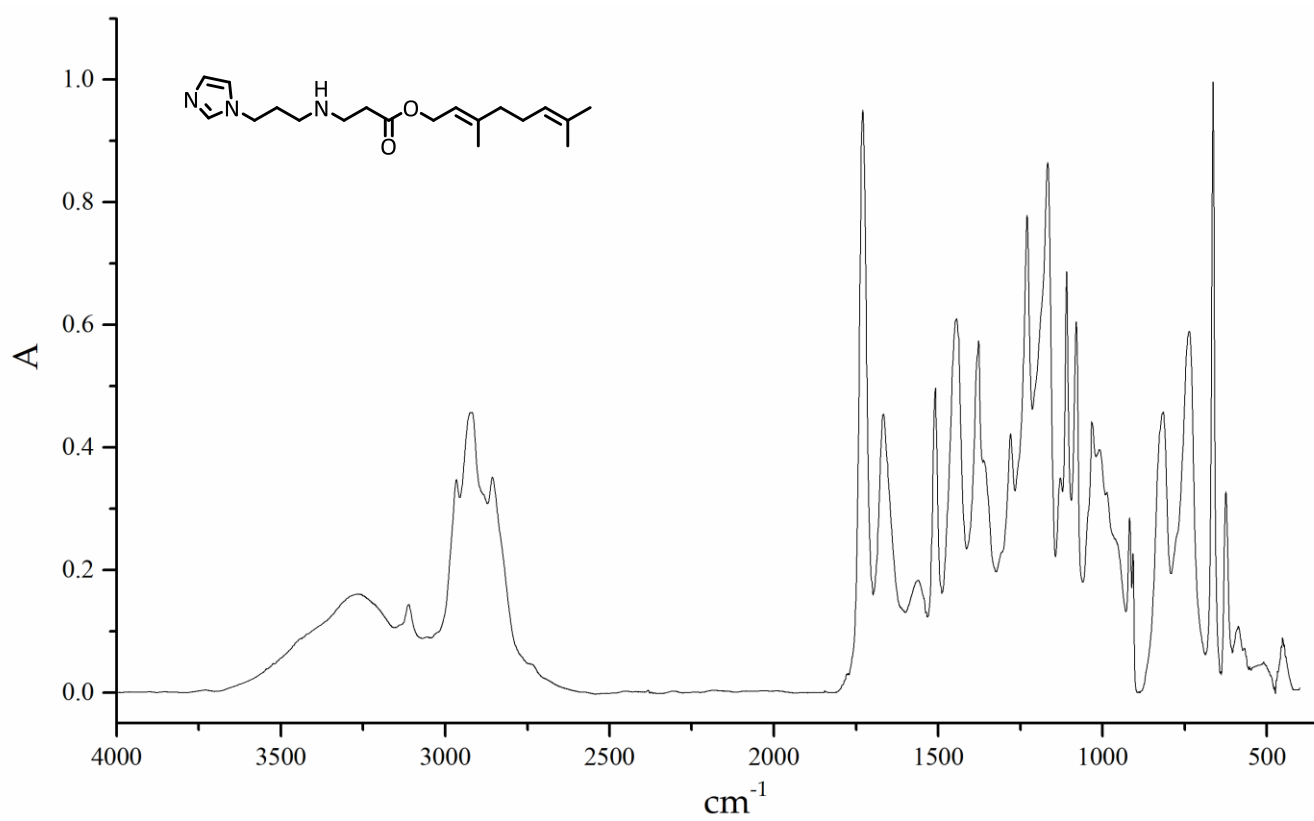

Figure S35. FT-IR spectrum of the compound **3a**.

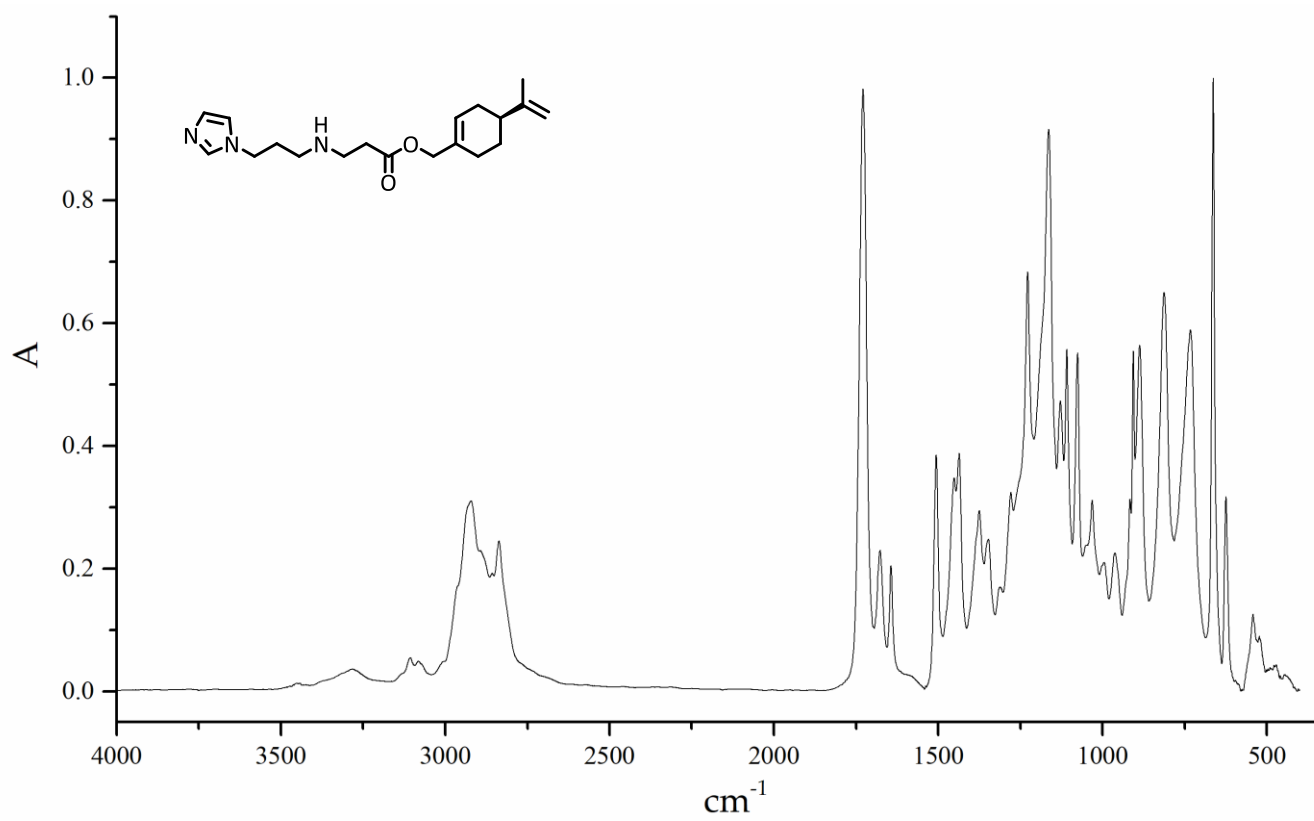

Figure S36. FT-IR spectrum of the compound **3b**.

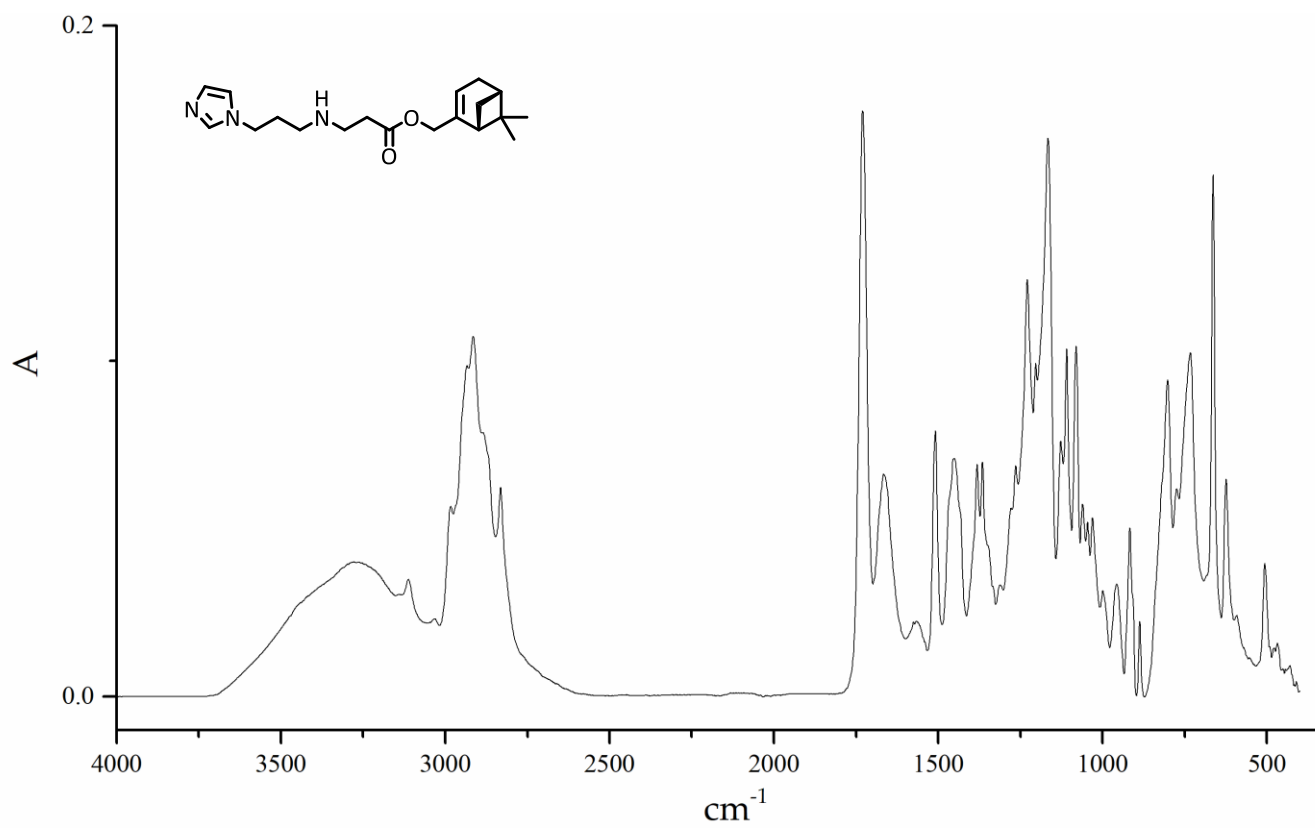

Figure S37. FT-IR spectrum of the compound **3c**.

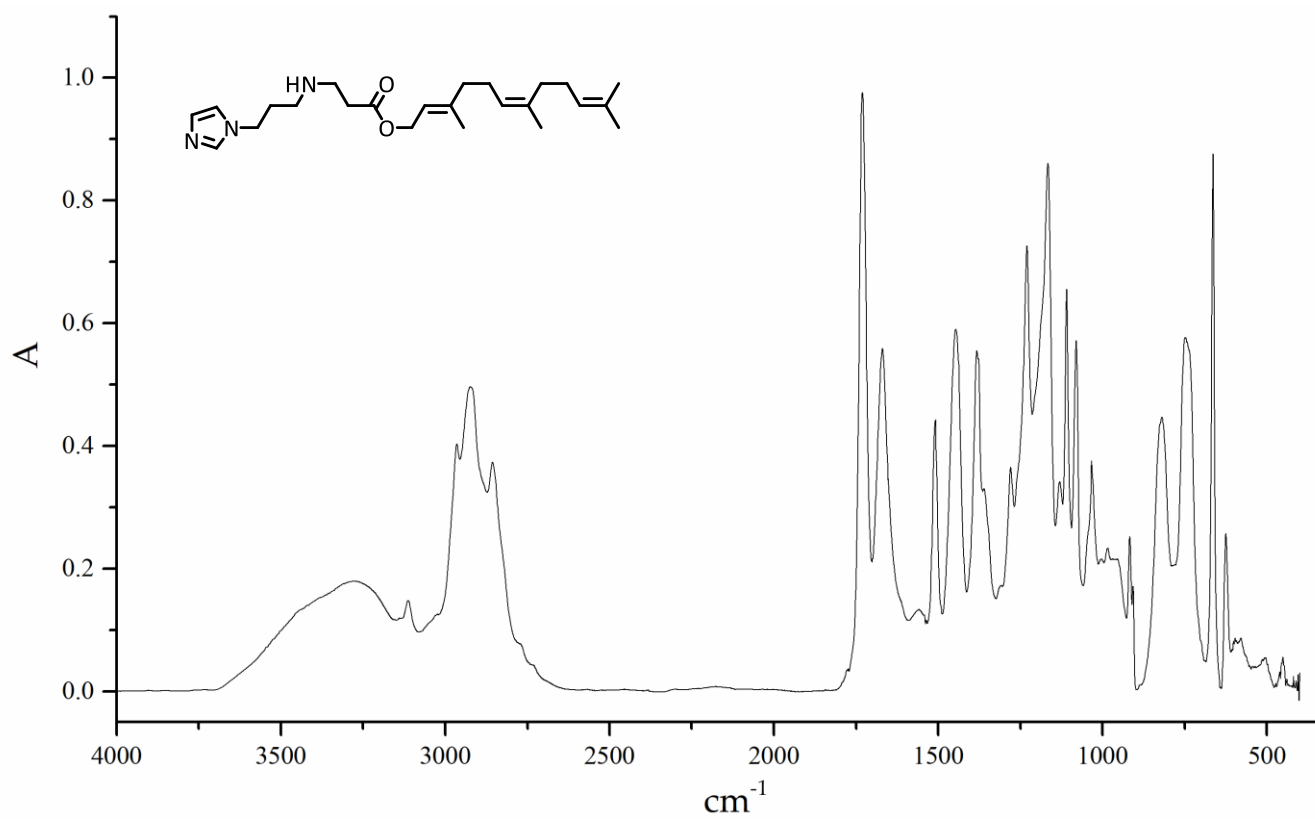

Figure S38. FT-IR spectrum of the compound **3d**.

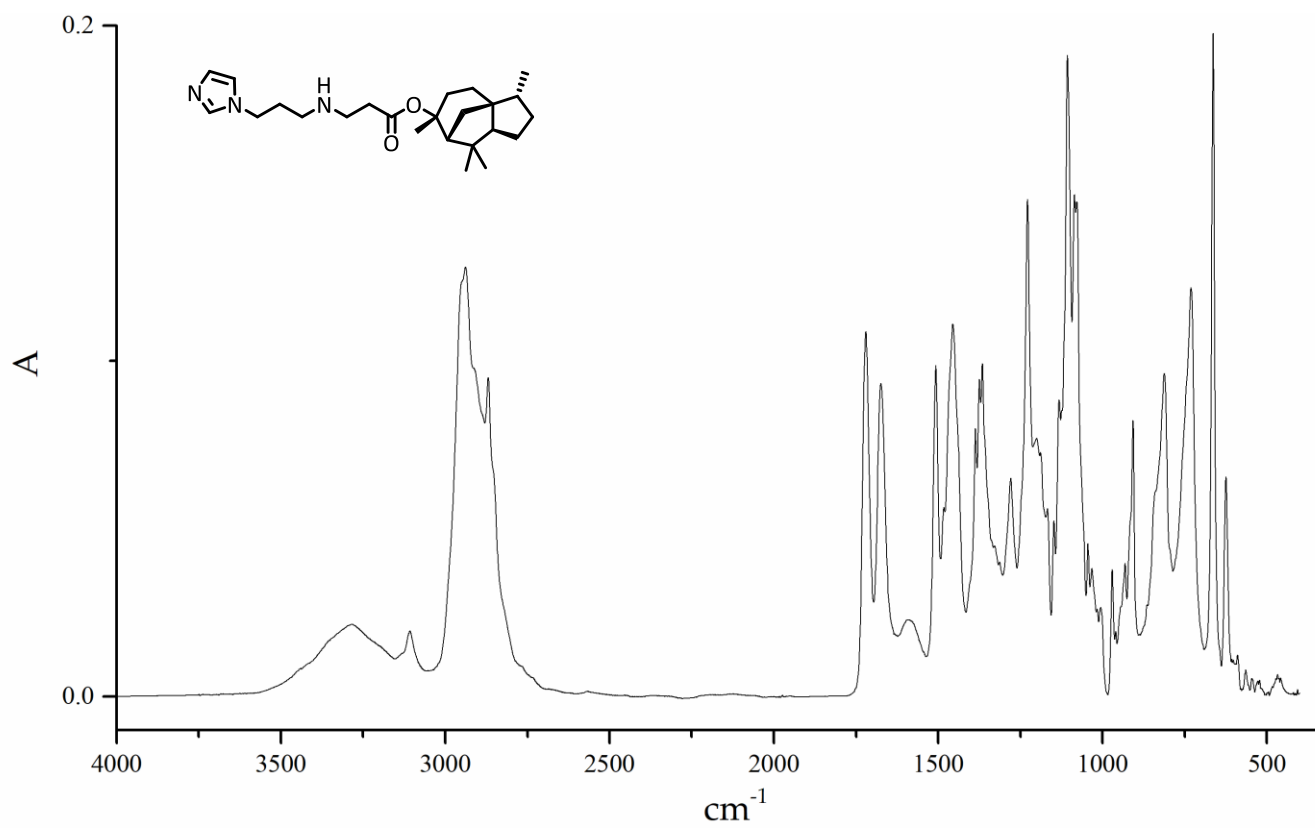

Figure S39. FT-IR spectrum of the compound **3e**.

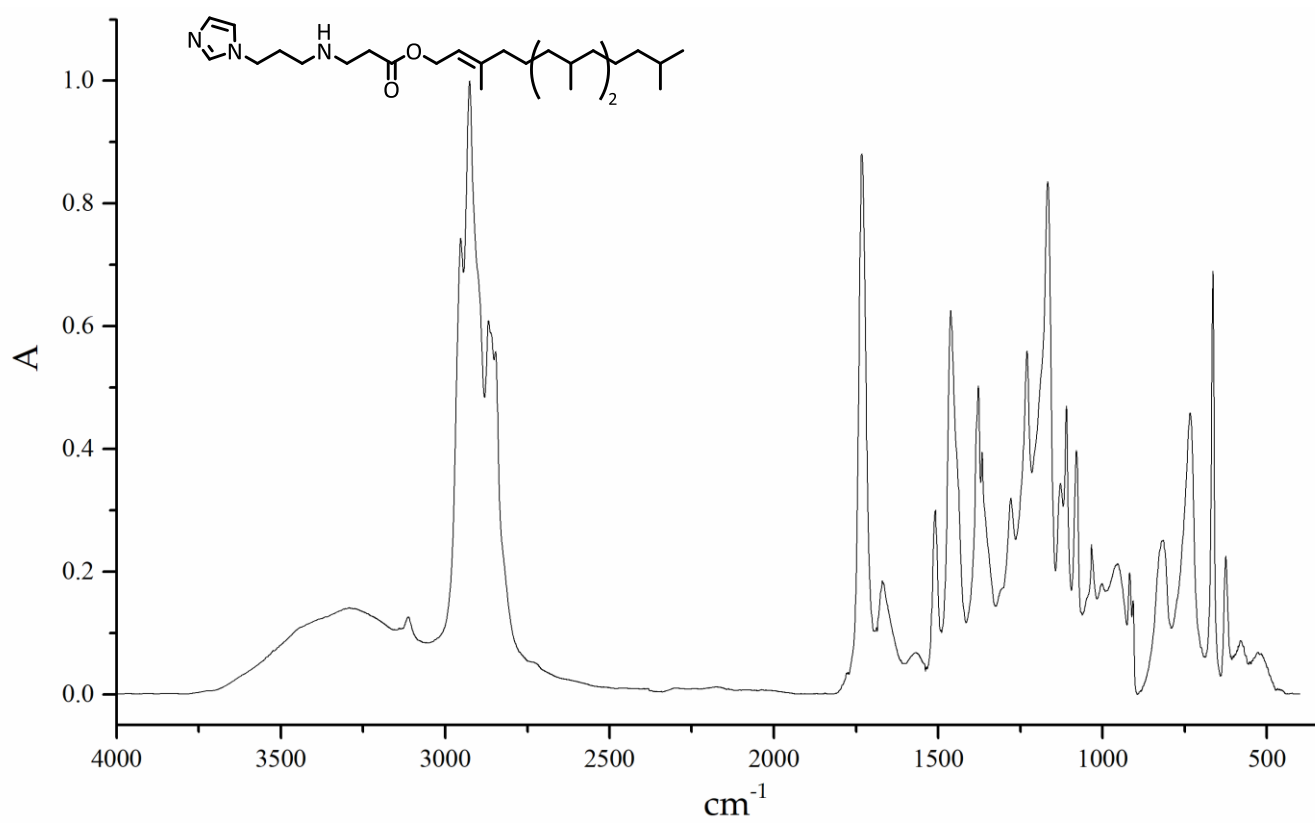

Figure S40. FT-IR spectrum of the compound **3f**.

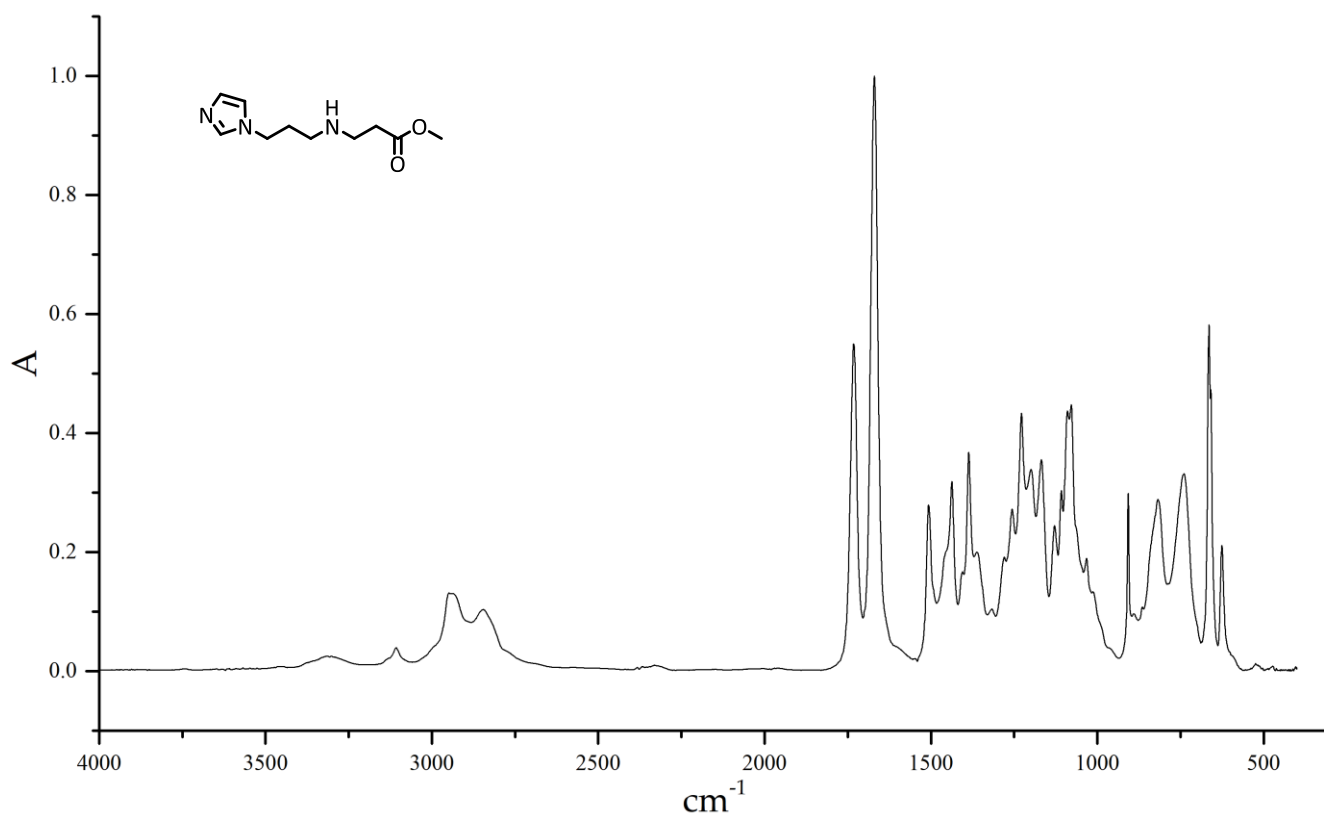

Figure S41. FT-IR spectrum of the compound **3g**.

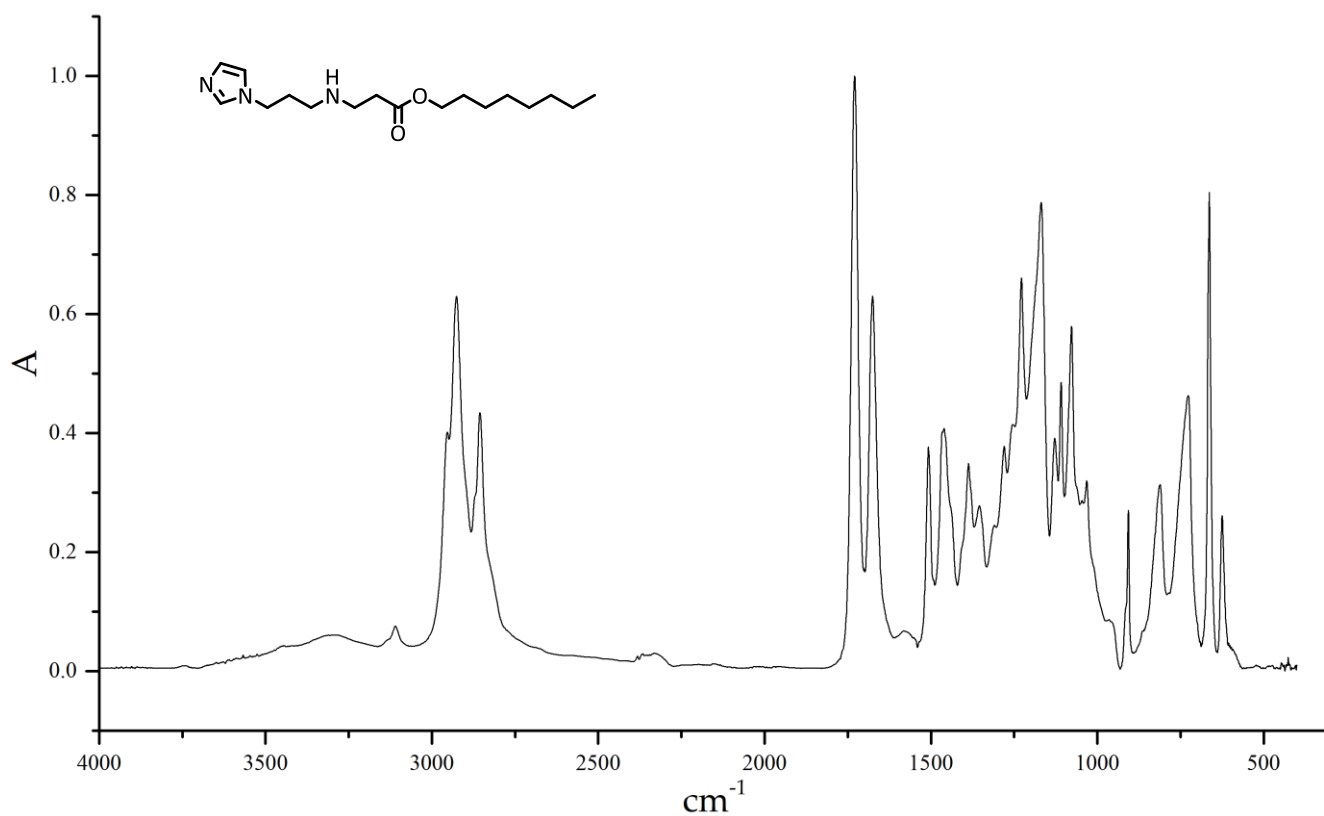

Figure S42. FT-IR spectrum of the compound **3h**.

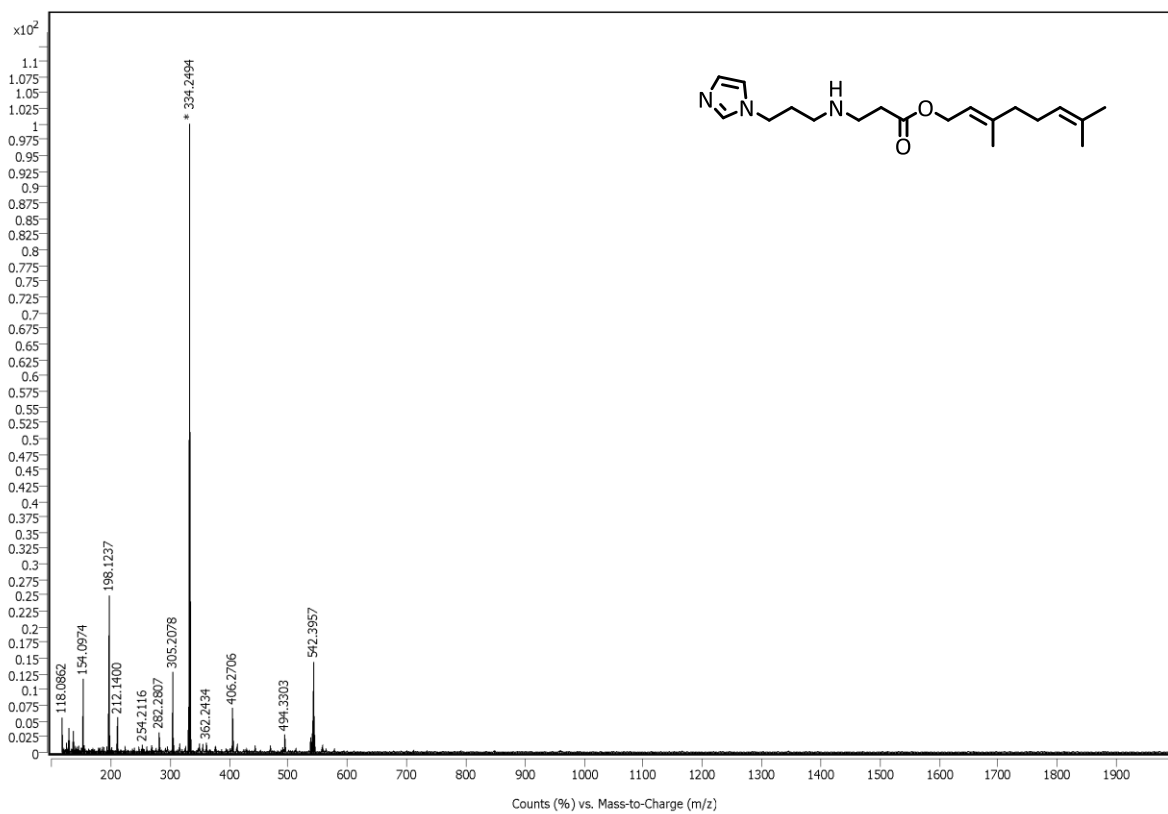

Figure S43. HRMS spectrum of the compound **3a**.

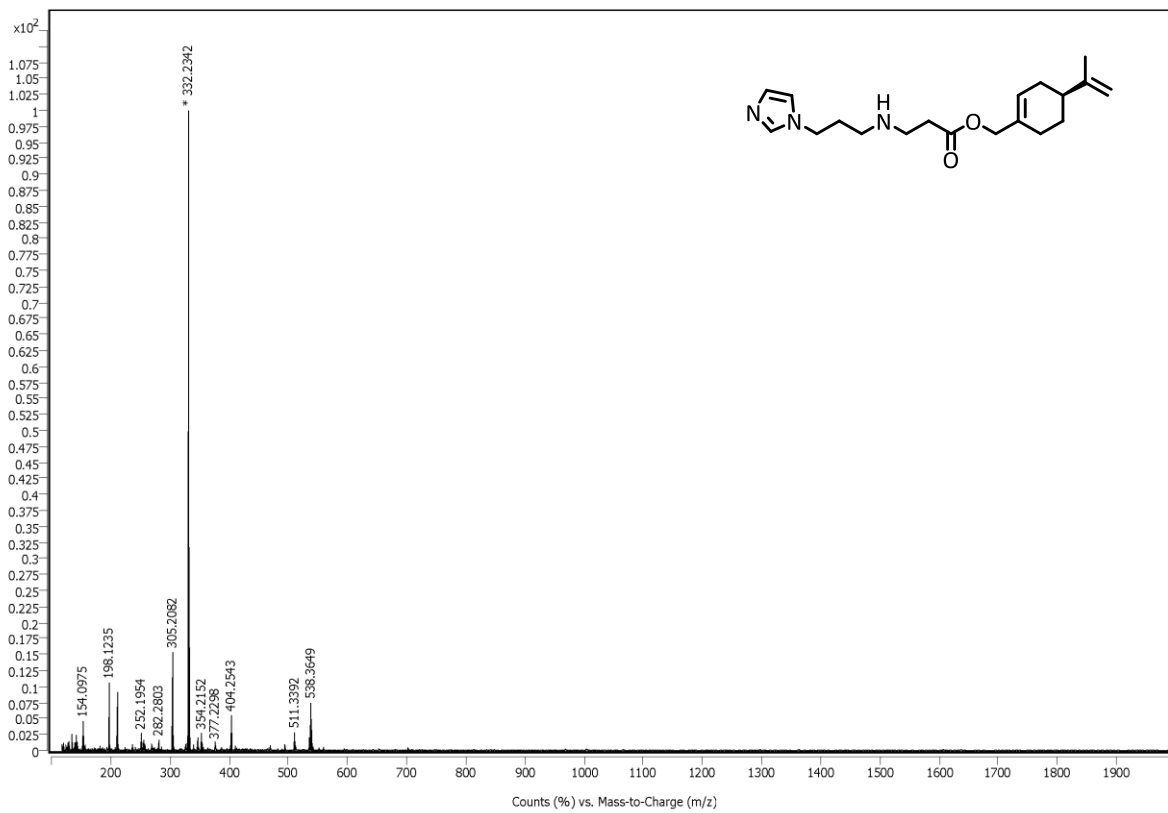

Figure S44. HRMS spectrum of the compound **3b**.

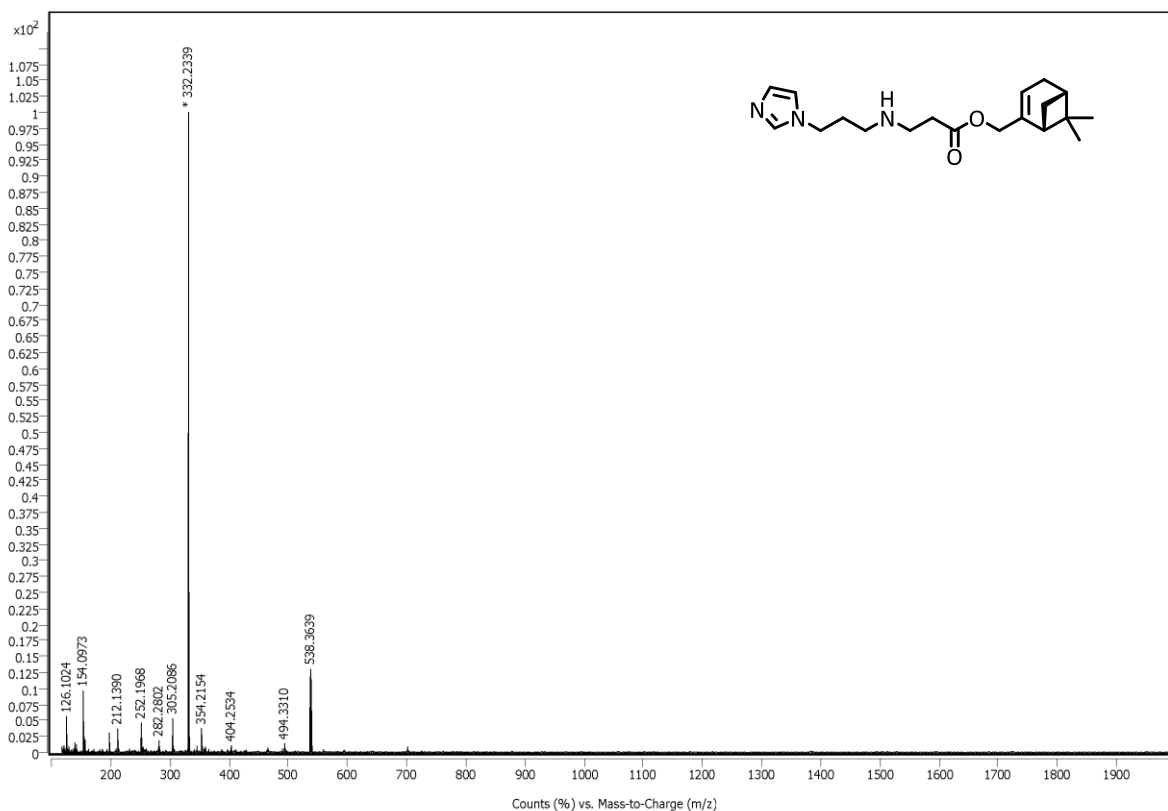

Figure S45. HRMS spectrum of the compound **3c**.

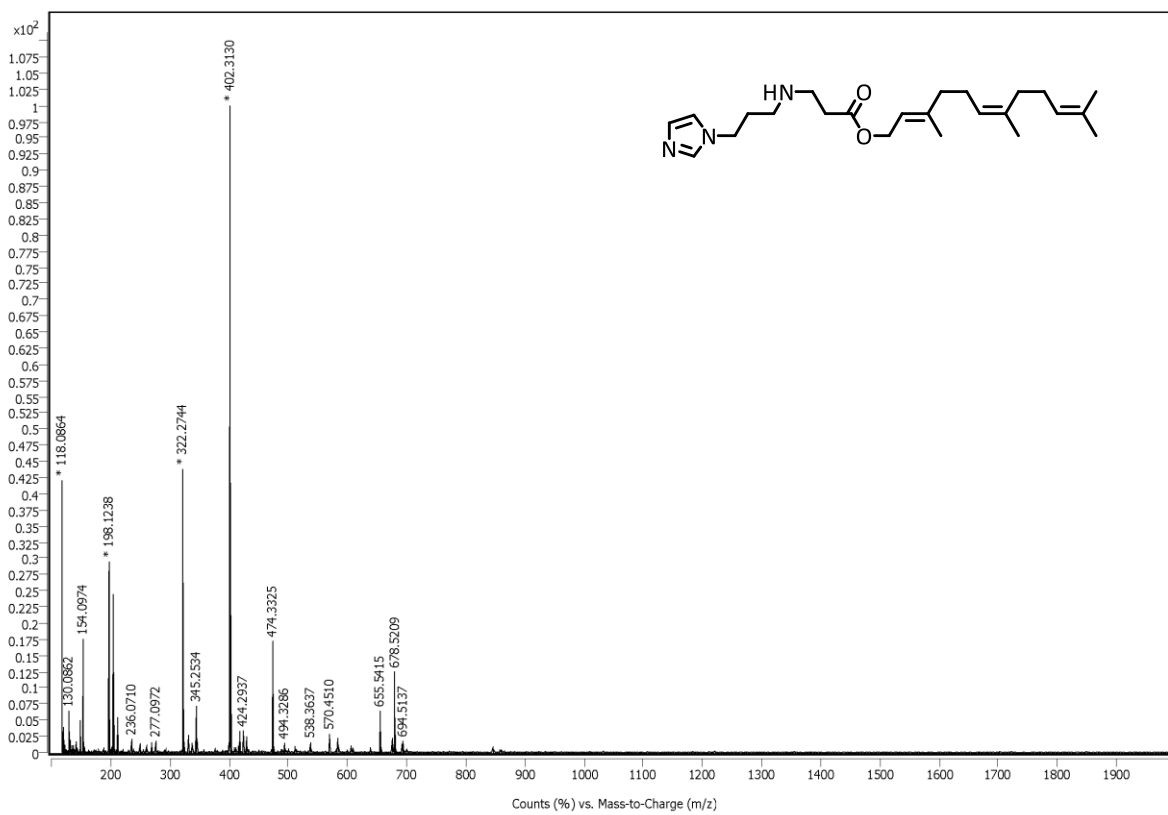

Figure S46. HRMS spectrum of the compound **3d**.



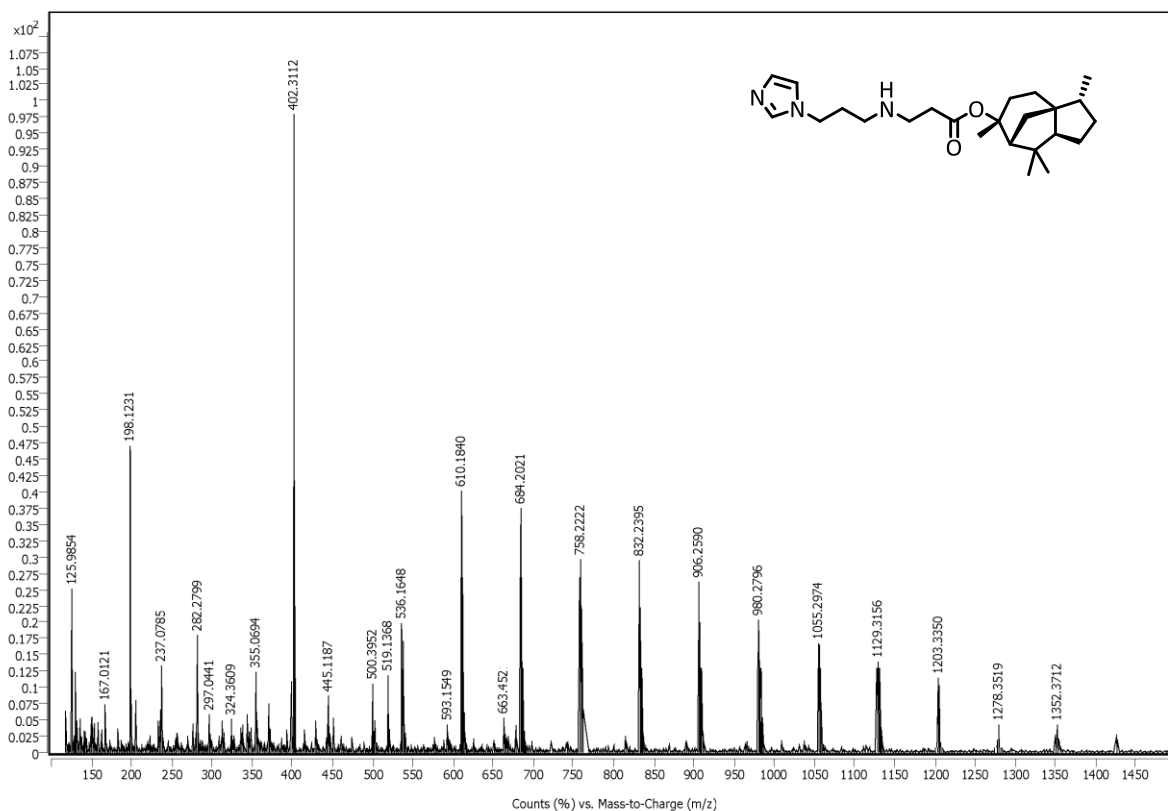

Figure S47. HRMS spectrum of the compound **3e**.

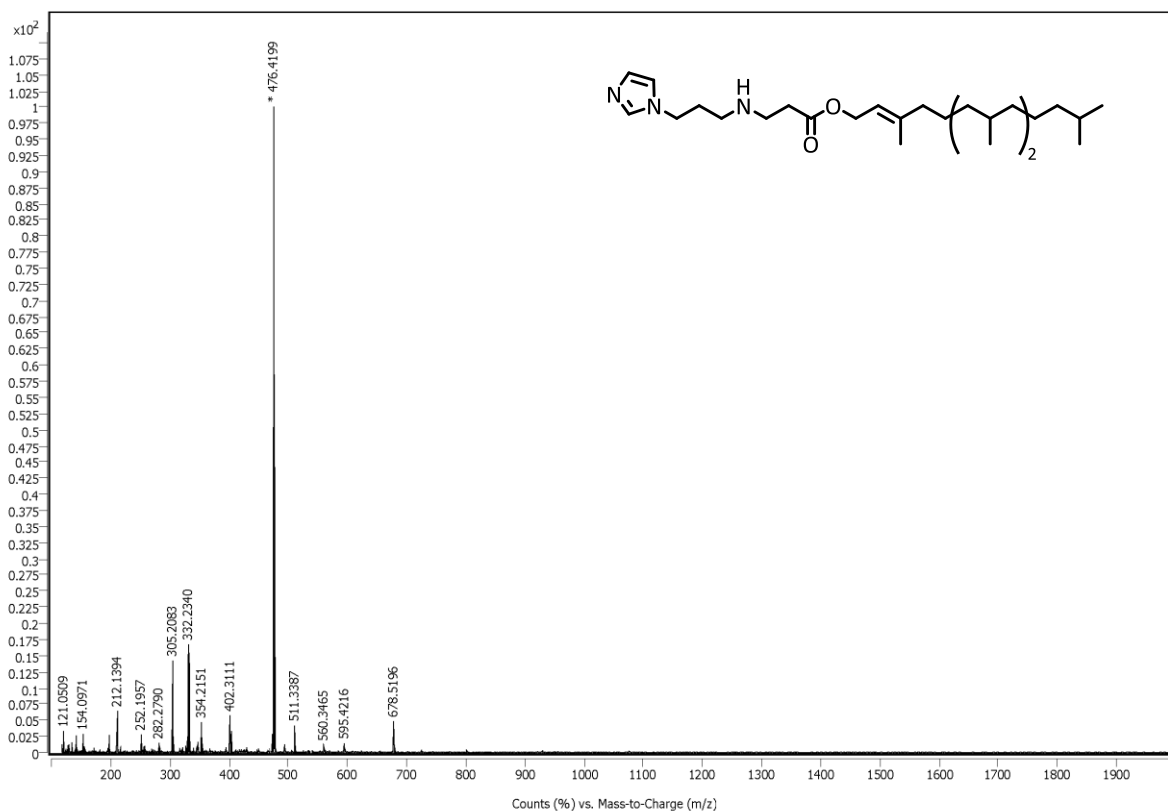

Figure S48. HRMS spectrum of the compound **3f**.

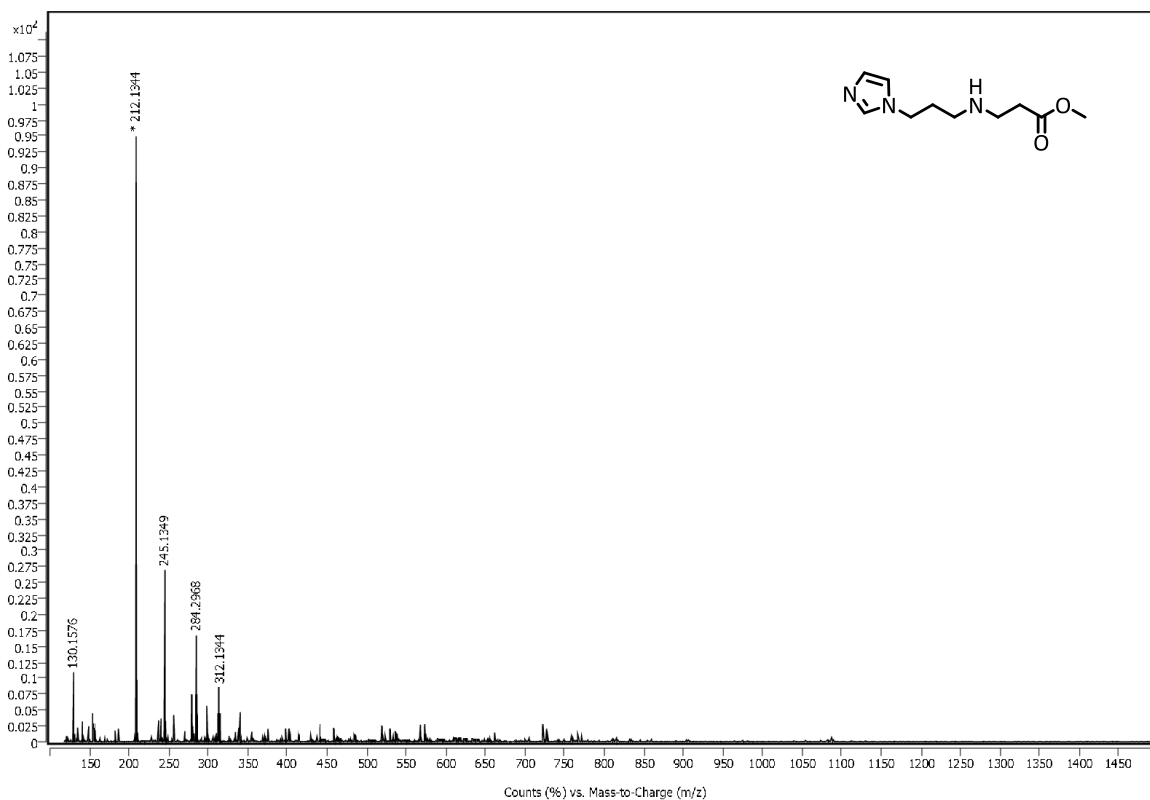

Figure S49. HRMS spectrum of the compound **3e**.

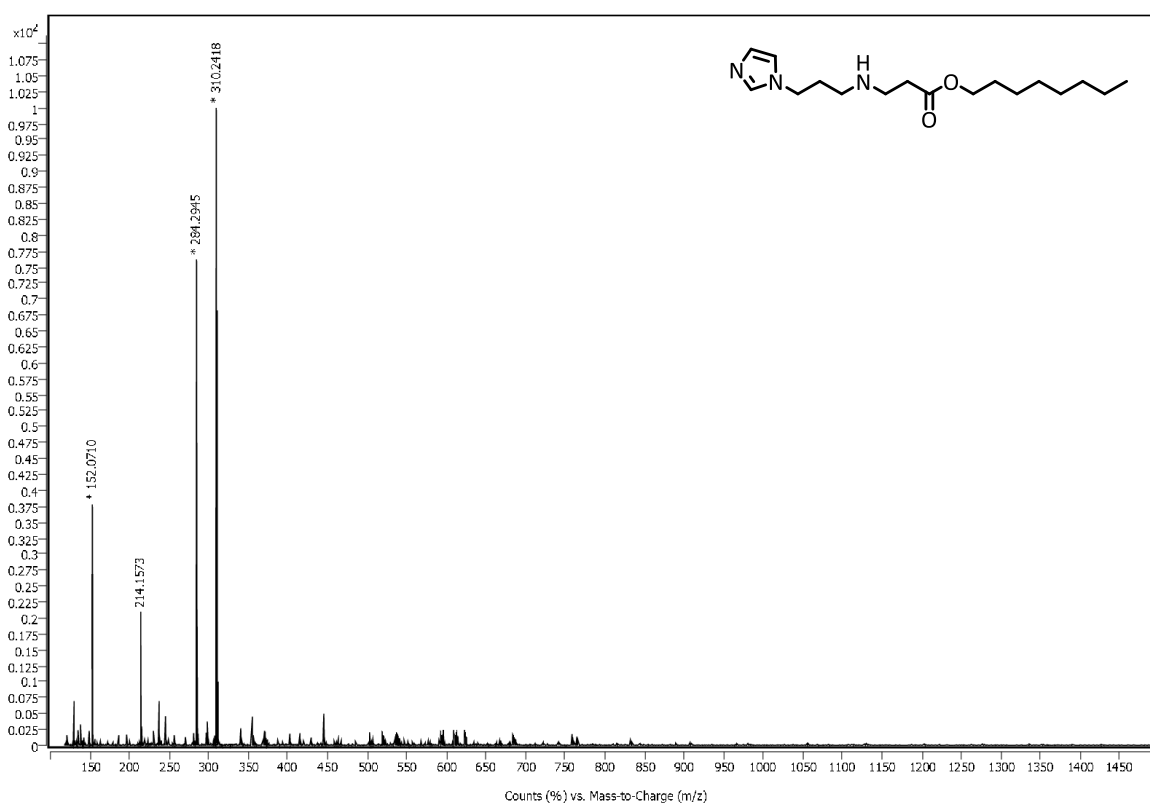

Figure S50. HRMS spectrum of the compound **3h**.

# Dynamic light scattering

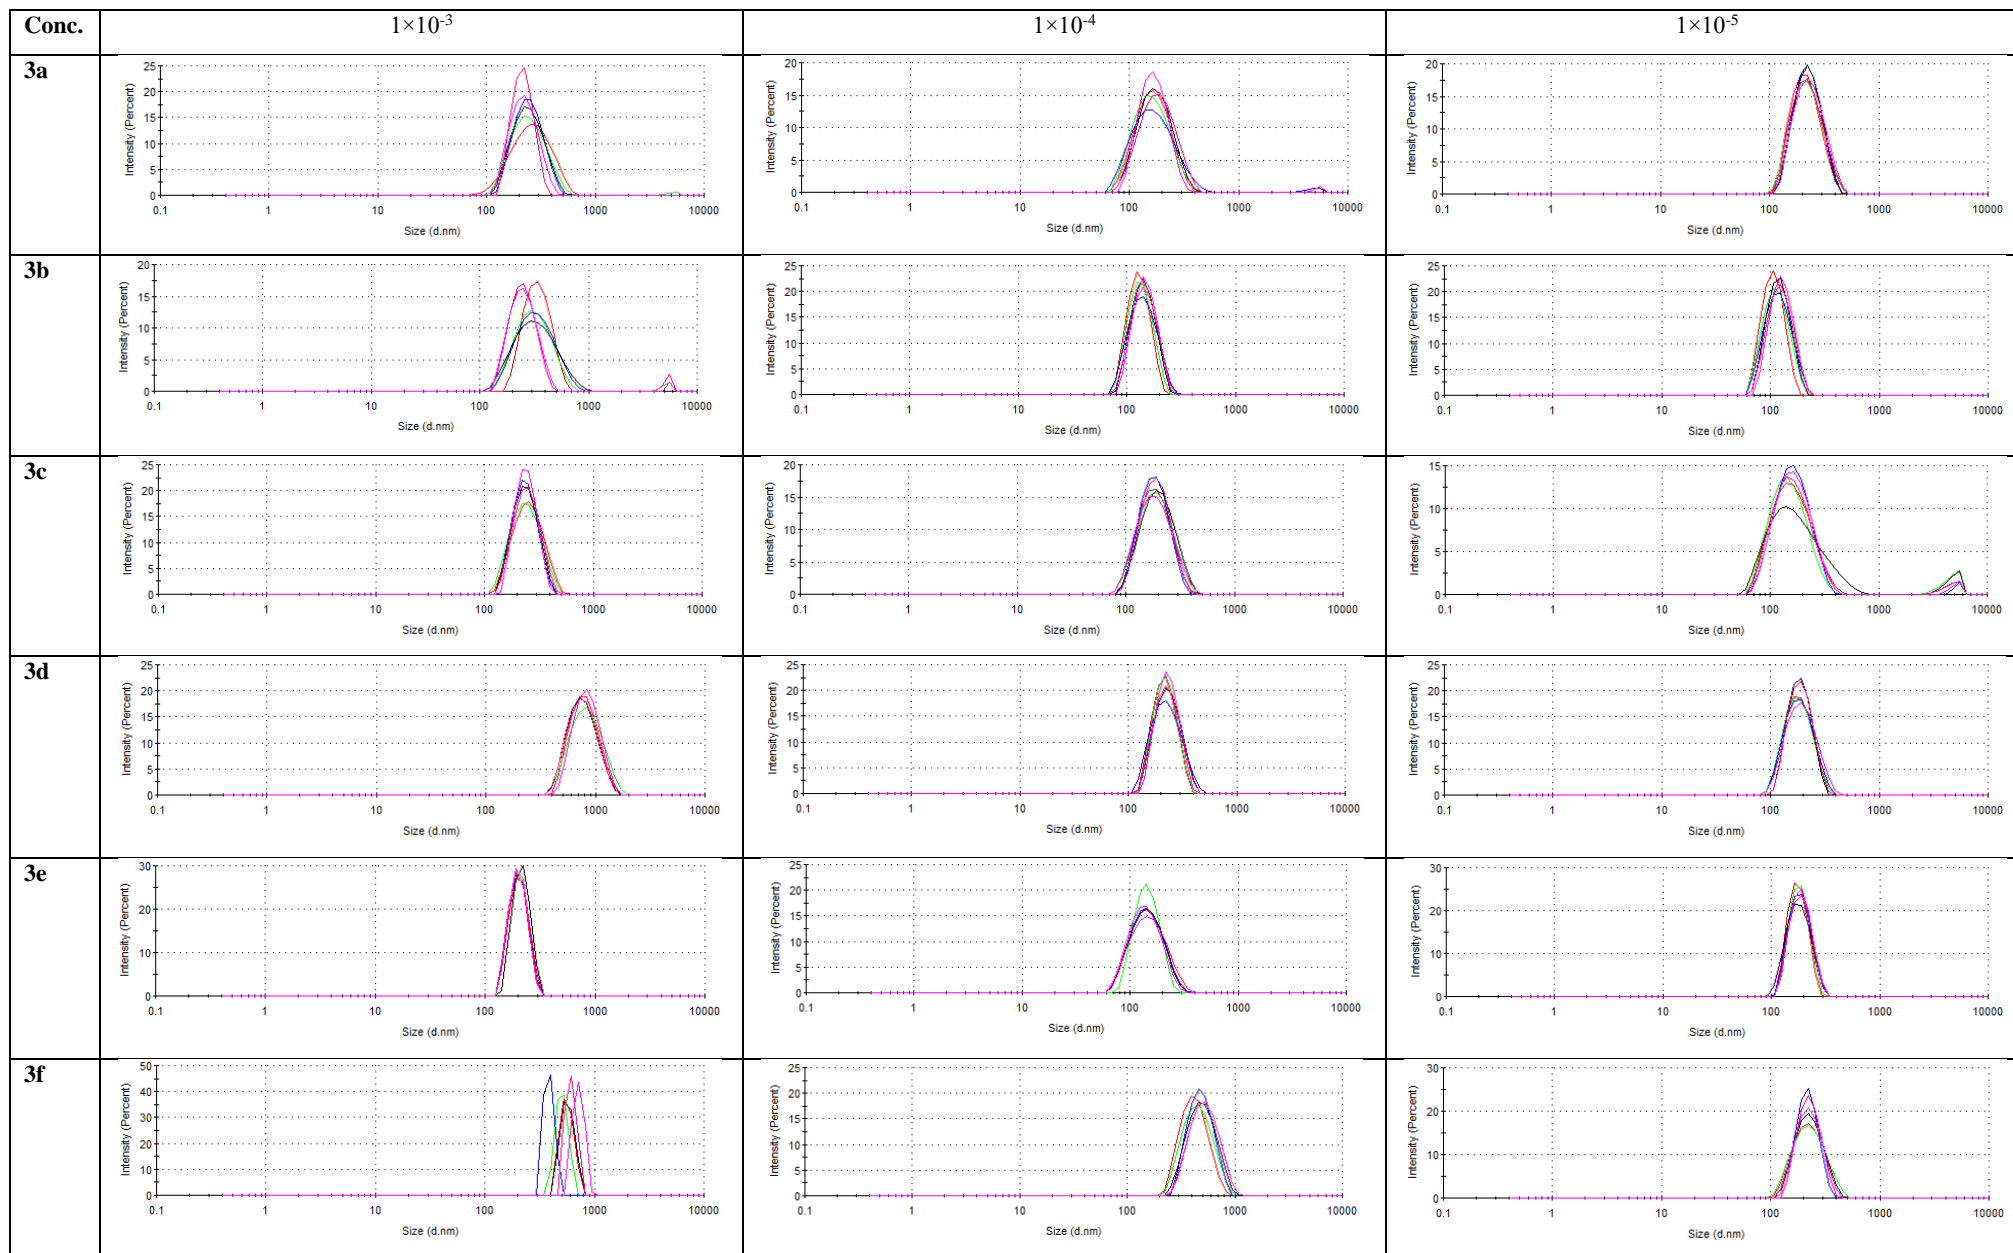

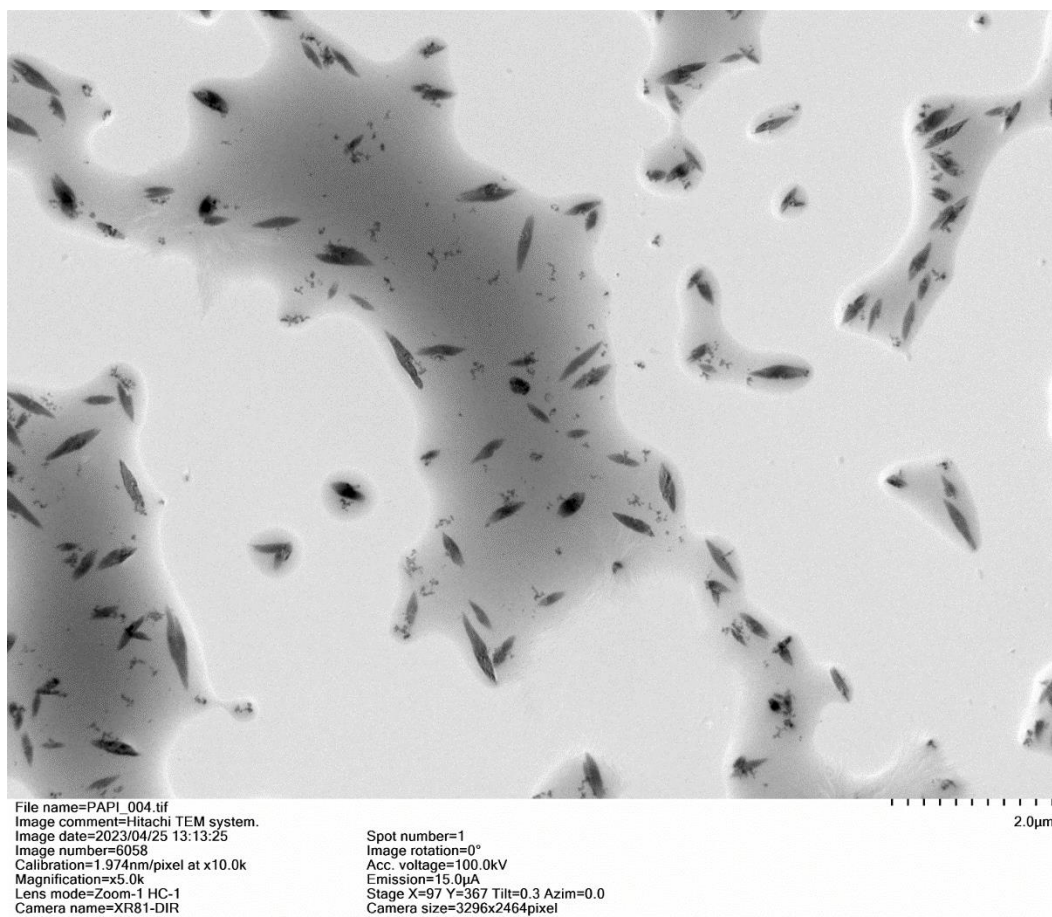

Figure S51. TEM image of associates of the compounds **3f**

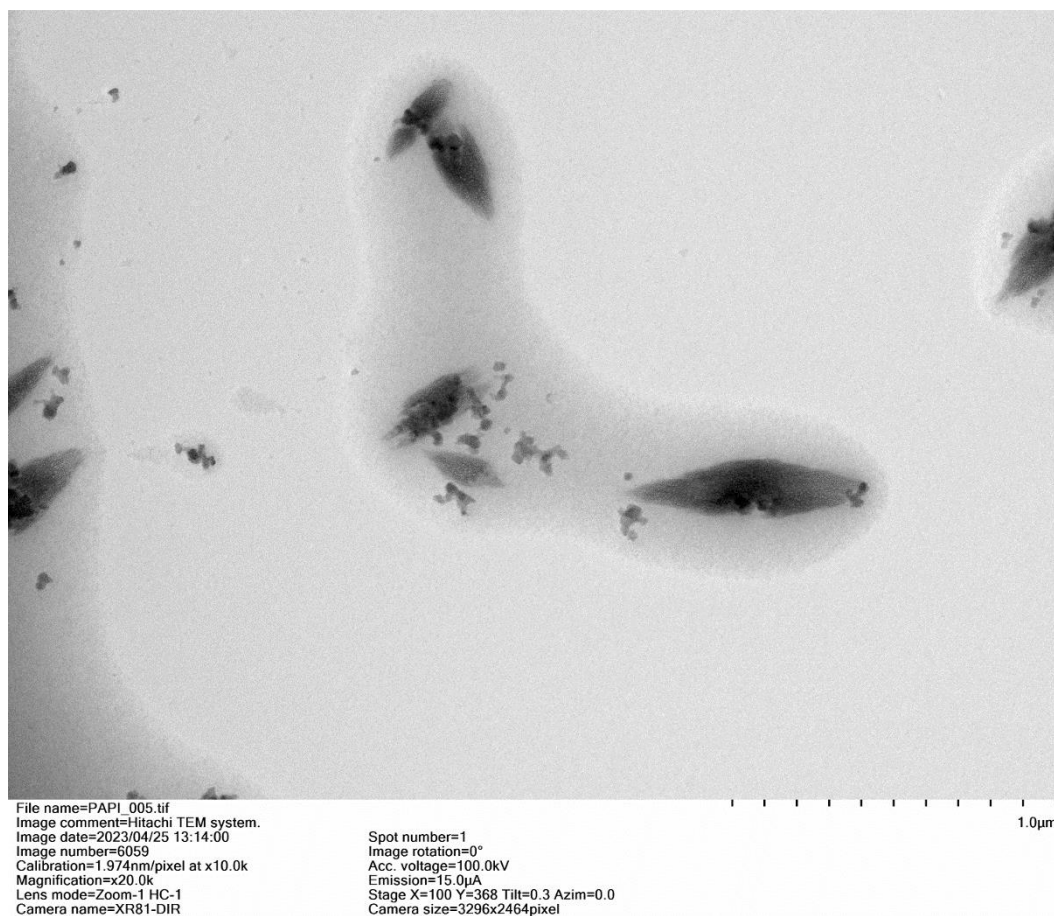

Figure S52. TEM image of associates of the compounds **3f**

### Linear equation parameters of $T_m$ against Molar ratio

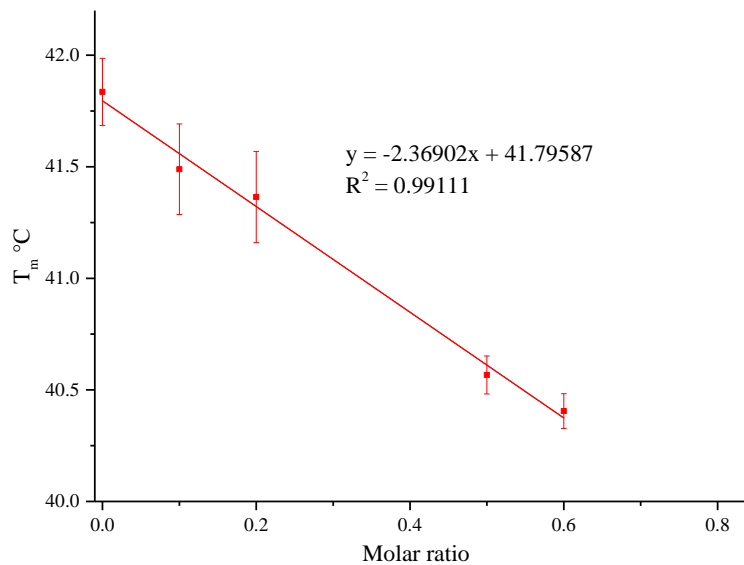

Figure S53. Linear dependence of  $T_m$  against Molar ratio for compound **3a**

| Compound 3a |          |            |
|-------------|----------|------------|
| Molar ratio | $T_m$    | $T_mEr\pm$ |
| 0           | 41.83555 | 0.15025    |
| 0.1         | 41.48899 | 0.20304    |
| 0.2         | 41.3646  | 0.20434    |
| 0.5         | 40.56708 | 0.08498    |
| 0.6         | 40.40513 | 0.0779     |

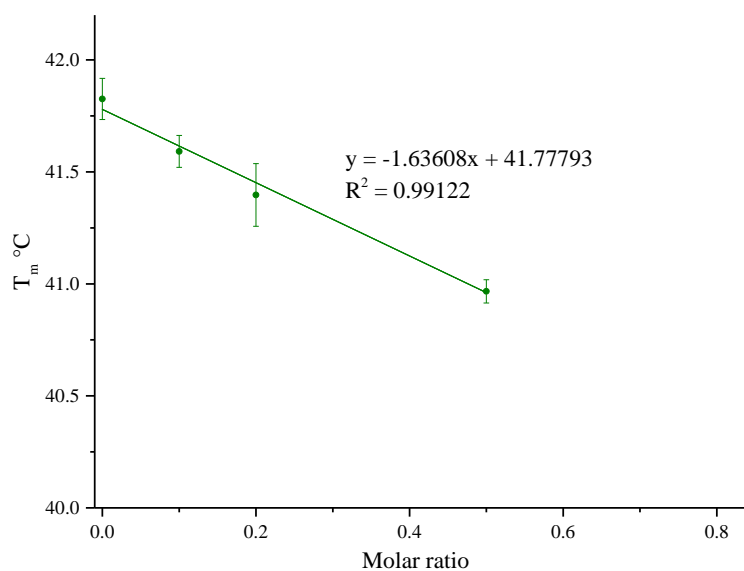

Figure S54. Linear dependence of  $T_m$  against Molar ratio for compound **3b**

| Compound 3b |          |            |
|-------------|----------|------------|
| Molar ratio | $T_m$    | $T_mEr\pm$ |
| 0           | 41.82553 | 0.09189    |
| 0.1         | 41.59147 | 0.07145    |
| 0.2         | 41.39715 | 0.14003    |
| 0.5         | 40.96678 | 0.05187    |

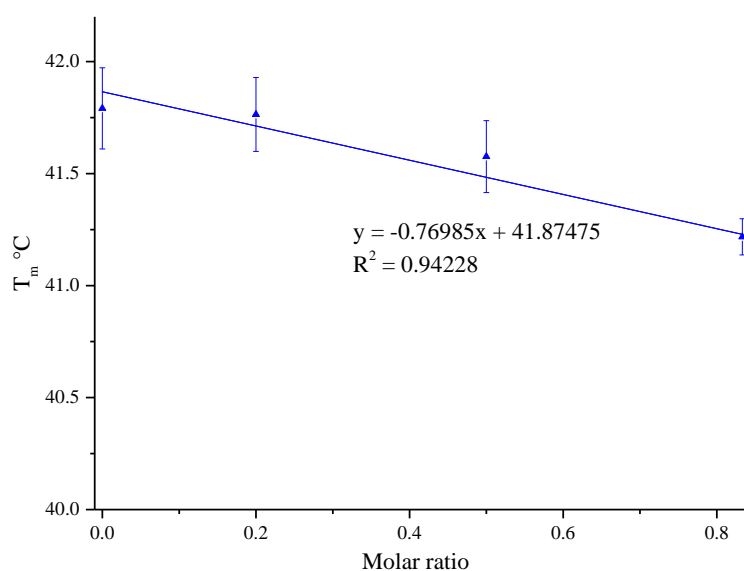

Figure S55. Linear dependence of  $T_m$  against Molar ratio for compound **3c**

| Compound 3c |          |            |
|-------------|----------|------------|
| Molar ratio | $T_m$    | $T_mEr\pm$ |
| 0           | 41.7911  | 0.1811     |
| 0.2         | 41.76406 | 0.16477    |
| 0.5         | 41.57609 | 0.16054    |
| 0.83333     | 41.21769 | 0.08057    |

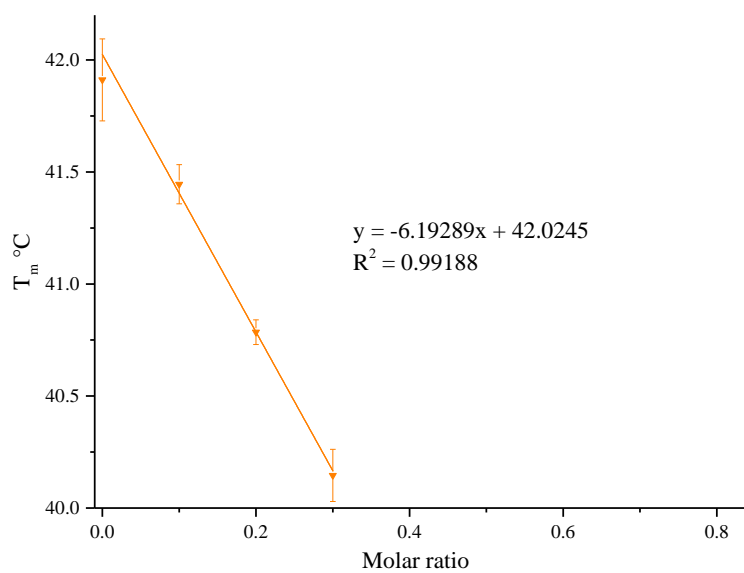

Figure S56. Linear dependence of  $T_m$  against Molar ratio for compound **3e**

| Compound 3e |          |            |
|-------------|----------|------------|
| Molar ratio | $T_m$    | $T_mEr\pm$ |
| 0           | 41.91109 | 0.18306    |
| 0.1         | 41.44516 | 0.08743    |
| 0.2         | 40.78502 | 0.05515    |
| 0.3         | 40.14568 | 0.11654    |

## Resazurin assay

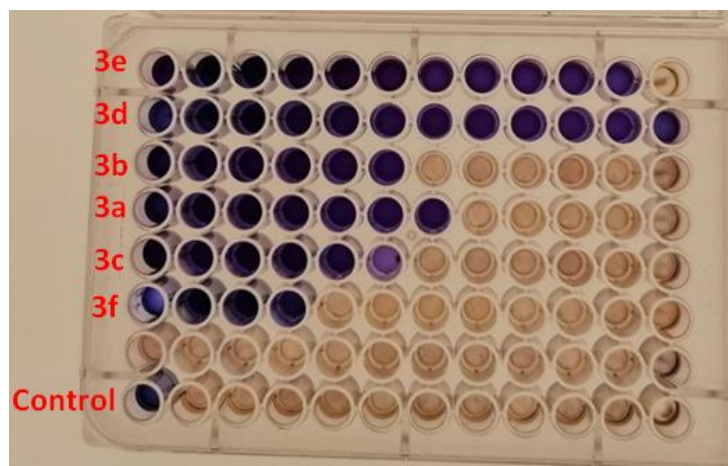

Figures S57. The ability of terpenoids (**3e**, **3d**, **3b**, **3a**, **3c**, **3f** respectively) to inhibit the growth of *Saccharomyces cerevisiae*

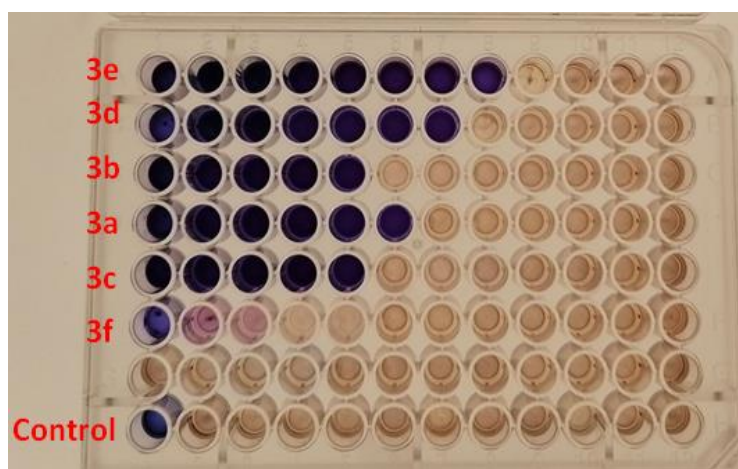

Figures S58. The ability of terpenoids (**3e**, **3d**, **3b**, **3a**, **3c**, **3f** respectively) to inhibit the growth of *Candida sp.*

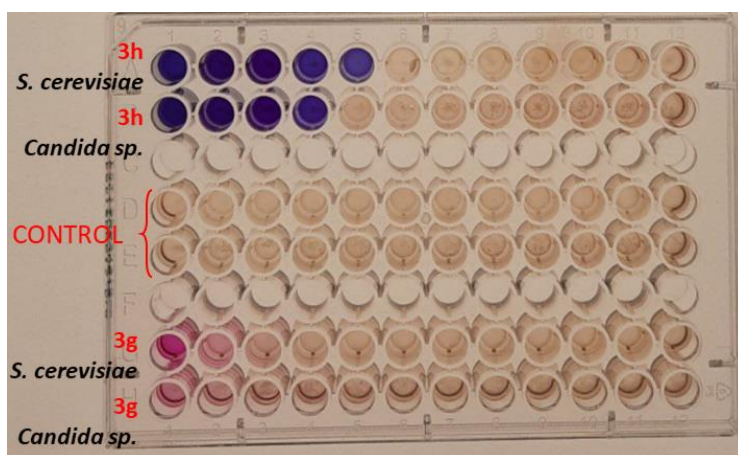

Figures S59. The ability of compounds **3g-h** to inhibit the growth of *Saccharomyces cerevisiae* and *Candida sp.*
